1 **Dominant species determine ecosystem stability across scales in Inner Mongolian grassland**

2

3 Yonghui Wang<sup>1</sup>, Shaopeng Wang<sup>2</sup>, Liqing Zhao<sup>1</sup>, Cunzhu Liang<sup>1</sup>, Bailing Miao<sup>1</sup>, Qing Zhang<sup>1</sup>,

4 Xiaxia Niu<sup>1</sup>, Wenhong Ma<sup>1\*</sup>, Bernhard Schmid<sup>3\*</sup>

5

6 <sup>1</sup>*Ministry of Education Key Laboratory of Ecology and Resource Use of the Mongolian Plateau*

7 *& Inner Mongolia Key Laboratory of Grassland Ecology, School of Ecology and Environment,*

8 *Inner Mongolia University, Hohhot, 010021, China*

9 <sup>2</sup>*Institute of Ecology, College of Urban and Environmental Sciences, and Key Laboratory for*

10 *Earth Surface Processes of the Ministry of Education, Peking University, Beijing, China*

11 <sup>3</sup>*Department of Geography, Remote Sensing Laboratories, University of Zürich,*

12 *Winterthurerstrasse 190, 8057 Zürich, Switzerland*

13

14 **E-mail addresses of all authors:**

15 Yonghui Wang, yhwang@imu.edu.cn

16 Shaopeng Wang, shaopeng.wang@pku.edu.cn

17 Liqing Zhao, zhaotieniu@126.com

18 Cunzhu Liang, bilcz@imu.edu.cn

19 Bailing Miao, miaobailing@126.com

20 Qing Zhang, qzhang82@163.com

21 Xiaxia Niu, bbx319@163.com

22 Wenhong Ma, whma@imu.edu.cn

23 Bernhard Schmid, bernhard.schmid@uzh.ch

24

25 **Running head:** Dominant species determining stability

26

27 **Manuscript:**

28 Abstract: 200 words; Table 1; Figures: 6

29

30 **Supplementary Information:**

31 5 figure supplement files and 2 source data files for Figure 4;

32 1 figure supplement files and a source data files for Figure 6;

33 5 supplementary files

34

35 **\* Authors for correspondence:**

36 **Wenhong Ma**

37 Phone: +86 15848927086

38 E-mail: whma@imu.edu.cn

39 Ministry of Education Key Laboratory of Ecology and Resource Use of the Mongolian Plateau &

40 Inner Mongolia Key Laboratory of Grassland Ecology, School of Ecology and Environment,

41 Inner Mongolia University, Hohhot, 010021, China

42

43 **Bernhard Schmid**

44 Phone: +41 79 681 99 36

45 E-mail: bernhard.schmid@uzh.ch

46 Department of Geography, Remote Sensing Laboratories, University of Zürich,

47 Winterthurerstrasse 190, 8057 Zürich, Switzerland

48 **Abstract**

49           There is an urgent need to extend knowledge on ecosystem temporal stability to larger  
50 spatial scales because presently available local-scale studies generally do not provide effective  
51 guide for management and conservation decisions at the level of an entire region with diverse  
52 plant communities. We investigated temporal stability of plant biomass production across spatial  
53 scales and hierarchical levels of community organization and analyzed impacts of dominant  
54 species, species diversity and climatic factors using a multi-site survey of Inner Mongolian  
55 grassland. We found that temporal stability at a large spatial scale, i.e. a large area aggregating  
56 multiple local communities, was related to temporal stability of and asynchrony among spatially  
57 separated local communities and large-scale population dynamics of dominant species, yet not to  
58 species richness. Additionally, a lower mean and higher variation of yearly precipitation  
59 destabilized communities at local and large scales by destabilizing dominant species population  
60 dynamics. We argue that, for semi-arid temperate grassland, dynamics and precipitation  
61 responses of dominant species and asynchrony among local communities stabilize ecosystems at  
62 large spatial scales. Our results indicate that reduced amounts and increased variation of  
63 precipitation may present key threats to the sustainable provision of biological products and  
64 services to human well-being in this region.

65

66 **Key words:** Biodiversity; Productivity; Scale dependence; Species synchrony; Precipitation;

67 Climate change

## 68 **Introduction**

69           The ability of ecosystems to stably provide biological products and services such as  
70 biomass production for human well-being (Isbell et al., 2015; Tilman et al., 2014, 2006) is being  
71 threatened by species loss (Cardinale et al., 2012; Harrison et al., 2015; Isbell et al., 2017, 2015;  
72 Newbold et al., 2015; Tilman et al., 2014) and pronounced climatic changes (Hautier et al., 2015,  
73 2014; Ma et al., 2017; Xu et al., 2015). Policymakers seek guidance to make management and  
74 conservation decisions at high levels of ecological organization, e.g. an entire region with diverse  
75 plant communities (Cardinale et al., 2012; Isbell et al., 2017; Manning et al., 2019; Wang et al.,  
76 2019), here referred to a large-scale community (Figure 1a). However, previous theoretical,  
77 experimental and observational studies on ecosystem temporal stability have mostly been  
78 conducted at local scales with constant environmental conditions (Hautier et al., 2015, 2014;  
79 Hector et al., 2010; Isbell et al., 2015; Ma et al., 2017; Tilman et al., 2006; Wang et al., 2020).  
80 Patterns of ecosystem temporal stability discovered in local communities may not directly scale  
81 up to a system of spatially separate communities (Lamy et al., 2019; McGranahan et al., 2016;  
82 Wang et al., 2019; Wang and Loreau, 2016, 2014; Wilcox et al., 2017; Zhang et al., 2019). Thus,  
83 there is an urgent need to understand temporal stability and the factors maintaining it at spatial  
84 scales covering larger areas (Gonzalez et al., 2020; Isbell et al., 2017; Wang et al., 2019).

85           Recent theoretical work facilitates investigations of ecosystem temporal stability at a  
86 larger spatial scale by relating it to its hierarchical components along two alternative pathways I  
87 or II (Wang et al., 2019) (Figure 1b; see Table 1 for definition of terms used in this study). Along  
88 pathway I, in a first step asynchronous dynamics among different species populations due to their  
89 dissimilar responses (species insurance effect) (Tilman et al., 2014; Yachi and Loreau, 1999)  
90 stabilize communities at local scale. In a second step, spatial asynchronous dynamics among local  
91 communities due to heterogeneities in habitat and species composition (spatial insurance effect of

92 communities) stabilize communities at a larger spatial scale (Wang and Loreau, 2016, 2014)  
93 (Figure 1b). Along pathway II, in a first step asynchronous dynamics among spatially separated  
94 local populations of each species, due to environmental heterogeneity (spatial insurance effect of  
95 populations) (Wang and Loreau, 2016, 2014), stabilize populations at a larger spatial scale. In a  
96 second step, asynchronous dynamics among large-scale populations of different species (species  
97 insurance effect) (Tilman et al., 2014; Yachi and Loreau, 1999) stabilize the large-scale  
98 community (Figure 1b). In the perhaps less likely case that populations and local communities  
99 respond synchronously to environmental fluctuations or environmental heterogeneity, the large-  
100 scale communities may be destabilized along the two alternative pathways. For example, a recent  
101 study showed that due to the strong driving effects of precipitation on biomass production of key  
102 species, its interannual variation forced synchronous dynamics of different species, destabilizing  
103 local communities (Wang et al., 2020).

104 Species diversity has been theoretically proposed to stabilize ecosystems at different  
105 ecological hierarchies, because species-rich communities are more likely to include species that  
106 have different responses to different environmental conditions across time and space, producing  
107 stable communities via species asynchrony (Thibaut and Connolly, 2013; Tilman et al., 2014;  
108 Wang and Loreau, 2016, 2014; Wang et al., 2020) (Figure 1b). In natural ecosystems, the role of  
109 species diversity in affecting temporal stability across different ecological hierarchies is still  
110 unclear. Theoretical and experimental studies propose stabilizing effects of (alpha) diversity  
111 within local communities (Hautier et al., 2015, 2014; Hector et al., 2010; Tilman et al., 2014,  
112 2006) (Figure 1b). However, these studies usually consider systems in which species abundance  
113 distributions are relatively even, at least at the beginning, whereas natural communities are often  
114 characterized by highly uneven abundance distributions and dominated by the dynamics of a few  
115 abundant species (Thibaut and Connolly, 2013; Wang et al., 2019). In this case, the predicted

116 local-scale diversity–stability relationship may be more difficult to be detected or it may be  
117 necessary to focus on the dynamic behavior of dominant species instead of species richness  
118 giving equal weight to all species (Wang et al., 2020; Xu et al., 2015; Yang et al., 2012). For  
119 example, our recent investigation on mechanisms maintaining temporal stability of local  
120 community biomass production in natural grasslands showed strong effects of dominant-species  
121 population dynamics instead of species richness (Wang et al., 2020). Furthermore, theoretical  
122 studies also propose that the heterogeneity in species compositions between spatially separated  
123 local communities (beta diversity) can increase asynchronous dynamics among them, resulting in  
124 stabilized communities at a larger spatial scale (Wang et al., 2019; Wang and Loreau, 2016)  
125 (Figure 1b). Currently, empirical evidence for such an effect is mixed as it was detected in some  
126 (Hautier et al., 2020; Liang et al., 2021; Wang et al., 2019) but not in other recent studies (Wilcox  
127 et al., 2017; Zhang et al., 2019). These studies looked at rather small spatial scales with  
128 potentially low beta diversity or even the same dominant species occurring among all local  
129 communities, making it difficult to detect a stabilizing effect of beta diversity. This further  
130 questions the usefulness of insights gained from studies across small spatial scales, even if they  
131 consider multiple local communities, for guiding regional management. Because different species  
132 may be dominant in different local communities in a larger spatial area, asynchrony among these  
133 local communities may contribute to temporal stability at a larger spatial scale (Wang et al., 2019;  
134 Wang and Loreau, 2016, 2014), a kind of spatial insurance (Isbell et al., 2018).

135 To investigate the temporal stability of biomass production (short “productivity”) at larger  
136 spatial scales, we established a region-scale observation network in Inner Mongolian grassland in  
137 China across an area of  $>166,894 \text{ km}^2$  and monitored the yearly dynamics of productivity over  
138 five consecutive years (Figure 2a). The Inner Mongolian grassland represents a typical part of the  
139 Eurasian grassland biome and is crucial in providing biological products and services to human

140 societies living there (Fang et al., 2015; Kang et al., 2007). In this region, plant community  
141 productivity and species richness and composition are driven by climatic factors, i.e. temperature  
142 and precipitation (Bai et al., 2004; Hu et al., 2018; Ma et al., 2010; Wang et al., 2020; Xu et al.,  
143 2015). These have changed considerably during the past decades (Huang et al., 2015; Piao et al.,  
144 2010) with largely unknown ecological consequences, especially at large spatial scales. To  
145 facilitate the large-scale temporal stability investigation, we employed a simulated landscape  
146 method (Hautier et al., 2018; van der Plas et al., 2016) to construct large-scale communities  
147 consisting of two local communities (two observed sites) separated by 17–987 km (Figure 2a).  
148 Briefly, each large-scale community was constructed by randomly choosing two local  
149 communities without replacement to ensure the constructed large-scale communities were  
150 independent between each other (see Figure 2b for a simplified 7-site case and Materials and  
151 Methods for details). Based on the above logical framework, we investigated how asynchronous  
152 dynamics among local or large-scale populations, especially those of dominant species (see  
153 Supplementary file 1–2 for details of dominant species and dominant-species measures), and  
154 among local communities contributed to the temporal stability of large-scale communities in the  
155 study region (see Supplementary file 3 for impacts of spatial distance). We used measures of  
156 synchrony and the coefficient of variation, CV, as “negative” proxies of asynchrony and temporal  
157 stability, respectively, and tested how these were affected by temporal variation in precipitation.  
158 We also tested whether species diversity could drive temporal stabilities at different spatial scales.

159

## 160 **Results**

161 We found that the large-scale community CV was positively associated with either all-  
162 species (Figure 3a–b, Figure 4a) or dominant-species measures (Figure 4b, see Supplementary  
163 file 2 for details of dominant-species measures) of local-scale community CV and community

164 spatial synchrony in regression analyses and final SEMs based on the upscaling pathway I of  
165 aggregating local communities (see Figure 4—source data 1–2 for details of SEMs). In addition,  
166 the local-scale community CV (Figure 3e–f, Figure 4a) and its dominant-species counterpart  
167 (Figure 4b) were positively related to the local-scale population CV and local-scale species  
168 synchrony of all and dominant species, respectively. Furthermore, for all-species measures, the  
169 CVs decreased from 0.76 at the local population to 0.38 at the local community level and further  
170 to 0.29 at the large-scale community level (Figure 4a). We found that, in this upscaling pathway I,  
171 the local-scale species synchrony (mean = 0.49) was lower than the community spatial synchrony  
172 (mean = 0.78) (Figure 4a).

173 For the upscaling pathway II of aggregating large-scale populations, our final SEMs using  
174 all-species (Figure 3c–d, Figure 4a) and dominant-species measures (Figure 4b, see  
175 Supplementary file 2 for details of dominant-species measures) showed that the large-scale  
176 community CV was positively associated with the large-scale population CV and the large-scale  
177 species synchrony (see Figure 4—source data 1–2 for details of SEMs). In addition, although  
178 linear regression for all-species measures showed that the large-scale population CV was not  
179 related to species spatial synchrony (Figure 3h), this path was supported by the final SEM (Figure  
180 4a). Furthermore, the CVs declined from 0.76 at the local-scale population level to 0.71 at the  
181 large-scale population level, and further to 0.29 at the large-scale community level (Figure 4a). In  
182 this upscaling pathway II, the large-scale species synchrony (mean = 0.41) was much lower than  
183 the species spatial synchrony (mean = 0.94) (Figure 4a).

184 We found that species diversity indices had almost no impacts on CVs and synchronies  
185 across ecological organization levels with few exceptions at the local scale, such as the impacts  
186 of local community diversity (i.e. alpha diversity) on local-scale species synchrony and local-  
187 scale population CV (see Materials and Methods for calculating species diversity indices across



188 scales and Figure 4—source data 1–2 for details of SEMs). Specifically, gamma, beta and alpha  
189 diversity indices had no impacts on large-scale community CV, community spatial synchrony  
190 and local-scale community CV, respectively, when using either all-species (Figure 5a, 5d–5e,  
191 Figure 6) or dominant-species measures (Figure 4—figure supplement 1b). In addition, when  
192 using all-species measures, alpha species diversity negatively influenced local-scale species  
193 synchrony but positively influenced local-scale population CV (Figure 4a, Figure 5f–5g, Figure  
194 6b). When using dominant-species measures, only the alpha species richness had a positive  
195 impact on local-scale population CV (Figure 4b). Moreover, gamma diversity indices had no  
196 influences on large-scale species synchrony when using either all-species (Figure 5c and 6,  
197 Supplementary file 4) or dominant-species measures (Figure 4—figure supplement 1b). In addition,  
198 correlation and regression analyses showed that large-scale population CV was positively  
199 associated with gamma diversity when using all-species measures (Figure 5b) and positively  
200 associated with gamma species richness when using dominant-species measures (Figure 4—figure  
201 supplement 1). However, these paths were not supported by the final SEMs (Figure 4a–4b).  
202 Besides, our SEMs (Figure 6) and general linear models (Supplementary file 4) further exploring  
203 the impacts of species diversity indices across ecological hierarchies showed no impacts on the  
204 CVs of local community, large-scale population and large-scale community. We further found  
205 that dominant species as a group had strong impacts on CVs and synchronies with mean  
206 explanatory power ( $\overline{R^2}$ ) generally  $> 0.52$  (Supplementary file 5), except for the dominant species  
207 spatial synchrony ( $P_{-E} = 0.17$ ,  $\overline{R^2} = 0.14$ , Supplementary file 5—Figure 1h).

208 We also found that large-scale CVs and spatial synchronies of growing-season  
209 temperature and precipitation had no impacts on large-scale community CV and its hierarchical  
210 components (Figure 4—figure supplement 1). However, within local communities, local-scale

211 species synchrony increased with local-scale precipitation variability (Figure 4a, Figure 5h),  
212 whereas the local-scale population CV of dominant species was reduced by larger mean values of  
213 precipitation (Figure 4b, see Figure 4–source data 1–2 for details of SEMs).

214

## 215 **Discussion**

216       Based on a region-scale survey over 5 years in Inner Mongolian grassland, we  
217 investigated temporal stabilities (inverse of CVs) and asynchronies (inverse of synchronies)  
218 across spatial scales, and analyzed influences of species diversity, abundant species and climatic  
219 factors on them. We found that temporal stabilities at large spatial scale, i.e. large-scale  
220 community temporal stability, was related to that of and asynchronous dynamics among units at  
221 small scale, i.e. local-scale community temporal stability and community spatial asynchrony.  
222 However, stabilities and asynchronies were only impacted by species diversity at local scale but  
223 were driven by dominant species at local and large scales. Furthermore, decreasing mean and  
224 increasing interannual fluctuation of precipitation could, respectively, destabilize dominant  
225 species and synchronize population dynamics within local communities, impairing stability at  
226 large scales. These results indicate that reduced amounts and increased variation of precipitation  
227 (Huang et al., 2015; Piao et al., 2010) are key climatic changes threatening the sustainable  
228 delivery of biological products and services to human well-being in this region.

229

### 230 *Stability across ecological hierarchies*

231       We investigated stabilities across ecological hierarchies with two alternative upscaling  
232 pathways (Wang et al., 2019) and both of them showed gradually increasing temporal stability  
233 from low to high organization levels due to species insurance effects and spatial insurance effects  
234 of populations and communities, caused by asynchronous dynamics among species and localities

235 (Figure 4a). These patterns are consistent with recent studies carried out at single sites  
236 constructing multiple adjacent plots within meta-communities in grassland ecosystems (Hautier  
237 et al., 2020; McGranahan et al., 2016; Wang et al., 2019; Wilcox et al., 2017; Zhang et al., 2019)  
238 and at the regional scale in marine ecosystems (Lamy et al., 2019; Thorson et al., 2018), as well  
239 as recent theoretically proposed positive invariability–area relationships (Isbell et al., 2018; Wang  
240 et al., 2017). These results suggest that, at large spatial scales, spatial heterogeneity is important  
241 in maintaining stability; losing this heterogeneity (Fahrig et al., 2011; Gámez-Virués et al., 2015)  
242 can impair stability.

243         We found that the species insurance effect caused by among-species dissimilar responses  
244 (Tilman et al., 2014; Yachi and Loreau, 1999) was stronger in maintaining temporal stability at  
245 large spatial scales than the spatial insurance effects of populations and communities, despite the  
246 large spatial extent and thus expected large spatial heterogeneity of our study region (Figure 2a).  
247 This result is consistent with a recent investigation in marine plant communities (Lamy et al.,  
248 2019) but different from that in fish communities (Thorson et al., 2018). In our study, the region-  
249 wide synchronous variations in precipitation (mean = 0.86, ranged from 0.62 to 1.00)  
250 (Supplementary file 3–Figure 1b) potentially decreased the spatial heterogeneity and increased  
251 the relative importance of among-species dissimilarity and the species insurance effect. The more  
252 mobile fish populations and communities (Thorson et al., 2018) may be strongly attracted by  
253 certain environmental conditions, causing largely different spatial population patterns across  
254 years, strengthening the spatial insurance effects of populations and communities. In plant  
255 communities, the strong species insurance effect suggests that the large-scale community stability  
256 at least partly reflects the stability of local communities, which are prevalent in previous studies  
257 (Ma et al., 2017; Tilman et al., 2006; Xu et al., 2015; Yang et al., 2012). However, the large-scale  
258 community stability does not so much reflect local population and large-scale population

259 stabilities. The species insurance effect has also been shown to regulate ecosystem resistance and  
260 resilience to extreme climate events, e.g. drought (Xu et al., 2014). Our results indicate that  
261 insights on local-scale resistance and resilience (Isbell et al., 2015) can also potentially reflect  
262 these characteristics of larger spatial scales.

263

#### 264 *Influence of species diversity, dominant species and precipitation on ecosystem stability*

265 We only detected stabilizing impacts of species diversity at local scale (Figure 4, Figure  
266 5f–5g, Figure 6). The negatively impacted local-scale population temporal stability by alpha  
267 diversity is in line with theoretical and experimental biodiversity studies (Lehman and Tilman,  
268 2000; Tilman, 1999; Tilman et al., 2014, 2006), proposing that competition between coexisting  
269 species for resources in species-rich communities leads to low population stability. In addition,  
270 the detected positive association between local-scale species asynchrony and alpha diversity  
271 potentially results from the higher probability of species-rich communities to contain species that  
272 are different in responding to environmental fluctuations (Tilman et al., 2014; Yachi and Loreau,  
273 1999).

274 Previous studies reported mixed impacts of species diversity on stabilities and  
275 asynchronies at scales beyond the local. Some studies found significant influences (Hautier et al.,  
276 2020; Liang et al., 2021; Wang et al., 2019) and others found none (Wilcox et al., 2017; Zhang et  
277 al., 2019). It has been argued recently (Hautier et al., 2020) that investigations within a single site  
278 (Zhang et al., 2019) or multiple sites with non-standardized experimental protocol (Wilcox et al.,  
279 2017) may mask stabilizing effects of species diversity at large spatial scales. The current study  
280 used a multi-site dataset with a standardized survey protocol and found no impacts of species  
281 diversity at scales beyond local (Figure 4, Figure 6) but strong driving effects of dominant  
282 species at local and large scales (Figure 4b, Supplementary file 5). The highly uneven distribution

283 of species abundances could have been responsible for this pattern (Wang et al., 2020), as under  
284 the uneven distribution the contribution of the most diverse part of the community to stabilities  
285 and asynchronies was limited by low abundance (Thibaut and Connolly, 2013; Wang et al., 2019).  
286 Considering that many natural ecosystems are characterized by high unevenness (Dee et al., 2019;  
287 Jiang et al., 2009; Smith and Knapp, 2003), the reported strong influences of abundant species  
288 and weak influences of all-species diversity on stabilities and asynchronies may be quite common  
289 in the real world. More importantly, the current study also provides a tool to quantify impacts of  
290 abundant species, or even a certain species or a certain functional group, on stabilities and  
291 asynchronies at different ecological hierarchies.

292         The strong influence of precipitation on productivities of different species (Zhang et al.,  
293 2017) may also weaken the (spatial) insurance effect of species diversity (i.e. local-scale species  
294 asynchrony). Under such circumstances, fluctuation in precipitation forces similar responses in  
295 different species, decreasing the dissimilarity and thus asynchrony among species. This  
296 speculation is supported by the low local-scale species asynchrony under high precipitation  
297 fluctuation (Figure 4a, Figure 5h). Furthermore, we also found decreased dominant-species local-  
298 scale population temporal stability under low precipitation amount (Figure 4b), potentially owing  
299 to the decreasing mean-to-standard deviation ratio caused by the dominant-species biomass  
300 production being more steeply related to precipitation amount than to its standard deviation  
301 (Wang et al., 2020). The study region has been experiencing a pronounced decrease in  
302 precipitation and an increase in its variability during the past decades (Huang et al., 2015; Piao et  
303 al., 2010; Tao et al., 2015). Our results indicate that these changes in precipitation regimes may  
304 present a key threat to the sustainable provision of biological products and services to human  
305 well-being in the region.

306

307 **Materials and methods**

308 *Study region and plant community survey*

309         The Inner Mongolian temperate grassland has a continental monsoon climate with a short  
310 and cool growing season (from May to October, averaged temperature 12.9–18.4 °C across sites  
311 during the studied period from 2012–2016), concentrating ~90% of the annual precipitation  
312 (averaged precipitation 186.2–398.0 mm across sites from 2012–2016) (Wang et al., 2020). This  
313 region has three main vegetation types: meadow steppe (dominated by perennial grasses and  
314 forbs e.g. *Stipa baicalensis*, *Leymus chinensis* and *Convolvulus ammannii*), typical steppe  
315 (dominated by perennial grasses e.g. *Stipa grandis*, *Leymus chinensis* and *Stipa krylovii*) and  
316 desert steppe (dominated by perennial grasses and forbs e.g. *Stipa caucasica* and *Allium*  
317 *polyrhizum*) (Figure 2a). In this area, grazing and mowing are the most widely practiced land-use  
318 regimes with increasing intensities during the last decades (Fang et al., 2015; Wu et al., 2015).

319         We established a 5-year (2012–2016) region-scale survey over this area, including 23  
320 individual sites (latitudes 39.34–49.96 °N, longitudes 107.56–120.12 °E) covering all three  
321 grassland types (Figure 2a) (Wang et al., 2020). The sample plots of each site were randomly  
322 selected, excluding heavy anthropogenic disturbances (e.g. grazing and mowing). The plant  
323 communities were surveyed between late July and early August in each year in the following way.  
324 At each site, we marked three 1 m × 1 m quadrats along the diagonal of a 10 m × 10 m plot,  
325 harvested all living plant tissues and sorted them to species, and then oven-dried and weighed the  
326 harvested material to obtain aboveground biomass and species richness (for details see (Wang et  
327 al., 2020)).

328

329 *Construction of large-scale communities*

330 We constructed large-scale communities consisting of two local communities. We  
331 excluded 2 sites with only 3-year available data as their 2-year overlaps with others were too  
332 short for calculating a CV (Figure 2a), resulting in only 21 sites with available data of 4–5 years  
333 (2, 15 and 4 sites for meadow, typical and desert steppe, respectively) (Wang et al., 2020). The  
334 construction of large-scale communities was done with a simulated landscape method (Hautier et  
335 al., 2018; van der Plas et al., 2016). Specifically, the 21 local communities (sites) were randomly  
336 separated into 10 large-scale communities without replacement (2 local communities for each  
337 large-scale community with 1 remainder) to ensure that they were independent between each  
338 other (see Figure 2b for a simplified 7-site case). We repeated this random resampling process  
339 1000 times, resulting in 1000 resampled sets, each containing 10 large-scale communities that  
340 were independent of each other.

341  
342 *All-species and dominant-species diversity indices, CVs and synchronies across ecological*  
343 *hierarchies*

344 We estimated two alternative species diversity indices across ecological hierarchies,  
345 species richness ( $N$ ) and effective species richness ( $D$ ). The alpha ( $N^\alpha$ ) and gamma species  
346 richness ( $N^\gamma$ ) were defined as the total number of species at local and large scales and the beta  
347 species richness ( $N^\beta = N^\gamma / N^\alpha$ ) was used to measure dissimilarity among localities. Specifically,  
348 the alpha ( $N^\alpha$ ) and gamma ( $N^\gamma$ ) species richness were estimated as multiple-year mean ( $N^\alpha$ ) and  
349 multiple-year pooled species number ( $N^\gamma$ ) of the two local communities. To account for highly  
350 uneven species abundances in the study region, we also used effective species richness, the  
351 antilog of Shannon-Wiener diversity ( $D = e^{H'}$ ), reflecting how many species with an even  
352 abundance distribution would produce the same Shannon-Wiener diversity as observed for the  
353 actual uneven community (Wang et al., 2020). The alpha ( $D^\alpha$ ) and gamma ( $D^\gamma$ ) effective species

354 richness thus represented the Shannon-Wiener diversity at local and large scales, with beta  
355 effective species richness ( $D^\beta = D^\gamma / D^\alpha$ ) measuring its cross-locality dissimilarity (estimated with  
356 the same method used for species richness). These species diversity indices were estimated with  
357 all species or only dominant species, the latter defined as species whose biomass contributed  $> 5\%$   
358 to the total biomass of the large-scale community (Wang et al., 2020) (Supplementary file 1) over  
359 the 5 survey years (dominant-species measures designated with subscript  $d$ , such as  $N_d^\alpha$  for the  
360 alpha dominant species richness).

361 Here, we illustrate a recent theoretical framework (Wang et al., 2019) upscaling local-  
362 scale population CV to large-scale community CV and use superscripts  $P$  and  $C$  to designate the  
363 quantities at population level and community level, superscripts  $L$  and  $A$  the quantities of  
364 localities (e.g. local communities) and an aggregation of multiple localities (e.g. large-scale  
365 communities). In addition, we used superscript  $P \rightarrow C$  and  $L \rightarrow A$  to designate upscaling processes  
366 of organizing populations and aggregating localities, respectively. This theoretical framework  
367 showed that local-scale population CVs ( $CV^{P,L}$ ) can be upscaled to the large-scale community CV  
368 ( $CV^{C,A}$ ) via either the dynamics of local communities ( $CV^{C,L}$ ) or via the dynamics of large-scale  
369 populations ( $CV^{P,A}$ ) (Figure 1b, see Table 1 for details of abbreviations). In the first upscaling  
370 pathway (pathway I), local populations were first organized into local communities and then local  
371 communities were aggregated into large-scale communities. In this process, the CV decreases  
372 from local population to local community level and further to the level of large-scale community.  
373 The degrees of these decreases are determined by synchronous dynamics among local  
374 populations of different species within local communities (local-scale species synchrony,  $\varphi^{P \rightarrow C,L}$ )  
375 and among spatially separated local communities (community spatial synchrony,  $\varphi^{C,L \rightarrow A}$ ),  
376 respectively (Figure 1b). This is because synchronies take values between 0 (perfectly  
377 asynchronous) to 1 (perfectly synchronous), thus measuring the proportion of CVs upscaled to



378 higher organization levels from local populations to local communities or local communities to  
379 large-scale communities (Wang et al., 2019). In the alternative upscaling pathway (pathway II),  
380 the local populations were first aggregated to large-scale populations and then the large-scale  
381 populations were organized into large-scale communities. In this process, the decreases of CVs  
382 are determined by synchronous dynamics among spatially separated local populations of same  
383 species (species spatial synchrony,  $\phi^{P,L \rightarrow A}$ ) and among large-scale populations of different species  
384 (large-scale species synchrony,  $\phi^{P \rightarrow C,A}$ ) (Figure 1b).

385 We extended this theoretical framework to separate CVs and synchronies into dominant  
386 and subdominant species groups (Supplementary file 2) and only investigated the contributions of  
387 the dominant-species group to CVs and synchronies of communities consisting only of dominant  
388 species because remaining species contributed very little to total biomass and reduced model fits  
389 and predictions (Thibaut and Connolly, 2013; Wang et al., 2019). Briefly, in the upscaling  
390 pathway of aggregating local communities (pathway I), the dominant-species local population  
391 CV ( $CV_d^{P,L}$ ) stepwise interacts with dominant-species measures of local-scale species synchrony  
392 ( $\phi_d^{P \rightarrow C,L}$ ) and community spatial synchronies ( $\phi_d^{C,L \rightarrow A}$ ) and upscales to the dominant-species local  
393 community CV ( $CV_d^{C,L}$ ) and large-scale community CV, respectively (Supplementary file 2A–  
394 2C). In the upscaling pathway of organizing large-scale populations (pathway II), the dominant-  
395 species local population CV stepwise interacts with dominant-species measures of species spatial  
396 synchrony ( $\phi_d^{P,L \rightarrow A}$ ) and large-scale species synchrony ( $\phi_d^{P \rightarrow C,A}$ ) and upscales to the dominant-  
397 species large-scale population CV ( $CV_d^{P,R}$ ) and large-scale community CV, respectively  
398 (Supplementary file 2D–2E). The two upscaling pathways can produce slightly different large-  
399 scale community CVs (Supplementary file 2F), which is why we use two abbreviations for the  
400 latter, i.e.  $CV_{d_C}^{C,A}$  and  $CV_{d_P}^{C,A}$  for upscaling pathways of aggregating local communities and  
401 organizing large-scale populations.

402

403 *Climatic data*

404       Based on monthly climatic data collected from 119 climate stations and 2-km resolution  
405 digital elevation over this region, we calculated site-specific mean temperature and precipitation  
406 using the simple kriging method and spherical model of geostatistical analysis in ArcGIS  
407 software (Environmental Systems Research Institute Inc., Redlands, CA, USA). Because plants  
408 are more active during the growing season, only growing-season temperature (*MGT*),  
409 precipitation (*MGP*) and their CVs across spatial scales were used in the current study.  
410 Specifically, temperature (*MGT*) and precipitation (*MGP*) are cross-site averaged multi-year  
411 mean temperature and precipitation. In addition, CVs of *MGT* and *MGP* at the local ( $CV_T^L$  and  
412  $CV_P^L$ ) and large scales ( $CV_T^R$  and  $CV_P^R$ ), as well as their among-site synchronies ( $\phi_T^{L \rightarrow A}$  and  
413  $\phi_P^{L \rightarrow A}$ ) were estimated with the methods used for local-scale and large-scale community CVs and  
414 community spatial synchrony.

415

416 *Statistical analysis*

417       We analyzed the influence of distance between spatially separated local communities (i.e.  
418 sites) within large-scale communities on spatial synchronies of *MGT* and *MGP*, large-scale  
419 community CV as well as all-species and dominant-species measures of large-scale population  
420 CV and species and community spatial synchronies with linear regressions. However, we did not  
421 further include distance between sites as explanatory term in statistical analyses. This is because  
422 spatial distance only influenced spatial synchronies of *MGT* and *MGP* (Supplementary file 3) and  
423 both of them were not included in initial path-analysis models (see below for details of path  
424 analysis and statistical significance).

425 We used correlation analyses, linear regressions and path analyses to investigate the large-  
426 scale community CV in relation to its hierarchical components, species diversity indices and  
427 climatic factors (Figure 4–figure supplement 1, see Figure 4–figure supplement 2 for details of  
428 scenario combining three local communities into a large-scale community). Specifically, we  
429 established initial path-analysis models separately considering different upscaling pathways and  
430 different species diversity indices, as well as the large-scale community CV and its hierarchical  
431 components estimated with all species or only dominant species (Figure 4–figure supplement 3–  
432 5). These initial models stayed as close as possible to paths proposed to be essential in correlation  
433 analyses and recent theoretical studies (Wang et al., 2019; Wang and Loreau, 2016, 2014) (Figure  
434 4–source data 1–2, Figure 4–figure supplement 3–5). Then, structural equation models (SEMs,  
435 Figure 4–source data 1) and general linear models (Figure 4–source data 2) were used to analyze  
436 these proposed paths, to eliminate non-significant ones until containing only significant or  
437 marginally significant paths or reaching the lowest value of Akaike’s information criterion (for  
438 small sample size, *AICc*). Subsequently, SEMs were used to analyze the remaining paths in the  
439 final models (Figure 4–source data 1, Figure 4–figure supplement 5) (*piecewiseSEM* package  
440 (Lefcheck, 2016) of R 3.6.3 (R Core Team, 2013)). We note that the SEMs were only used to  
441 analyze the strengths of paths, rather than searching for best models *post hoc*. We did this even at  
442 the cost that overall model fits might have significantly deviated from a saturated model and used  
443 Shipley’s test of d-separation (Lefcheck, 2016; Shipley, 2013) besides Fisher’s *C* statistic (*C*) and  
444 *AICc* as an additional guide (Figure 4–source data 1).

445 Because species diversity indices were rarely included in initial path-analysis models  
446 (Figure 4–figure supplement 3–5), we used SEMs to further explore impacts of species diversity  
447 indices on the large-scale community CV and its hierarchical components based on theoretical  
448 predictions (Wang et al., 2019) (Figure 6–figure supplement 1, Figure 6–source data 1). In

449 addition, we also used general linear models (Supplementary file 4) to further explore local-scale  
450 and large-scale community CVs in relation to species diversity indices, considering the  
451 influences of their hierarchical components based on theoretical predictions (Wang et al., 2019).  
452 Specifically, we investigated the large-scale community CV in relation to gamma and beta  
453 diversity indices, separately considering local community CVs and community spatial synchrony  
454 as well as population CV and species synchrony of local scale. In addition, within local  
455 communities, we also explored the community CV in relation to alpha diversity indices,  
456 population CV and species synchrony.

457 We used a randomized examination method to investigate the statistical significance of  
458 the above analyses. Specifically, considering the 10 independent large-scale communities per  
459 sampled set, all above statistical analyses were conducted within each set, resulting in 1000  
460 statistics. These were then analyzed with the randomized examination method. Taking the  
461 correlation analysis as an example, we calculated the mean correlation coefficient ( $\bar{\rho}$ ) of the 1000  
462 sets and considered it to be statistically significant or marginally significant if the proportion of  $\rho$   
463  $< 0$  ( $P_{-\rho}$ ) (or  $\rho > 0$ ,  $P_{+\rho}$ ) was lower than 0.05 or 0.10 when  $\bar{\rho} > 0$  (or  $\bar{\rho} < 0$ ), respectively. For  
464 linear regressions and SEMs, we also used the randomized examination method to analyze the  
465 statistical significances of the estimated coefficients and calculated the mean explanatory power  
466 ( $\overline{R^2}$ ) of them, as well as the mean Fisher's  $C$  statistic ( $\bar{C}$ ) and the mean  $AICc$  ( $\overline{AICc}$ ) of SEMs.

467

## 468 **Acknowledgement**

469 This study was supported by the National Nature Science Foundation of China (31960259,  
470 31971434, 32160274, 31370454 and 31600385), the National Key Research and Development  
471 Program of China (2016YFC0500602), the Ministry of Science and Technology of China

472 (2015BAC02B04) and the Natural Science Foundation of Inner Mongolia (2019MS03089,  
473 2019MS03088 and 2015ZD05). S.W. was supported by the National Nature Science Foundation  
474 of China (31988102). B.S. was supported by the University Research Priority Program Global  
475 Change and Biodiversity of the University of Zurich. All authors declare no conflict of interest.

476

#### 477 **Author contributions**

478 YW, LZ, CL, BM, QZ, XN and WM designed the study and compiled the data. YW produced the  
479 results and wrote the first draft with SW, WM and BS. All authors contributed to the  
480 development of the manuscript.

481

#### 482 **Data availability statement**

483 The data that support the findings of this study are openly available in Figshare at  
484 <https://doi.org/10.6084/m9.figshare.16903309>.

485

#### 486 **Supplementary Information:**

487 Additional supporting information may be found online in the Supporting Information section at  
488 the end of this article.

489

#### 490 **References**

491 Bai Y, Han X, Wu J, Chen Z, Li L. 2004. Ecosystem stability and compensatory effects in the  
492 Inner Mongolia grassland. *Nature* **431**:181–184. doi:10.1038/nature02850  
493 Cardinale BJ, Duffy JE, Gonzalez A, Hooper DU, Perrings C, Venail P, Narwani A, Mace GM,  
494 Tilman D, Wardle DA. 2012. Biodiversity loss and its impact on humanity. *Nature* **486**:59.

- 495 Dee LE, Cowles J, Isbell F, Pau S, Gaines SD, Reich PB. 2019. When do ecosystem services  
496 depend on rare species? *Trends in Ecology & Evolution* **34**:746–758.  
497 doi:10.1016/j.tree.2019.03.010
- 498 Fahrig L, Baudry J, Brotons L, Burel FG, Crist TO, Fuller RJ, Sirami C, Siriwardena GM, Martin  
499 J-L. 2011. Functional landscape heterogeneity and animal biodiversity in agricultural  
500 landscapes: Heterogeneity and biodiversity. *Ecology Letters* **14**:101–112.  
501 doi:10.1111/j.1461-0248.2010.01559.x
- 502 Fang J, Bai Y, Wu J. 2015. Towards a better understanding of landscape patterns and ecosystem  
503 processes of the Mongolian Plateau. *Landscape Ecology* **30**:1573–1578.  
504 doi:10.1007/s10980-015-0277-2
- 505 Gámez-Virués S, Perović DJ, Gossner MM, Börschig C, Blüthgen N, de Jong H, Simons NK,  
506 Klein A-M, Krauss J, Maier G, Scherber C, Steckel J, Rothenwöhler C, Steffan-Dewenter  
507 I, Weiner CN, Weisser W, Werner M, Tschardt T, Westphal C. 2015. Landscape  
508 simplification filters species traits and drives biotic homogenization. *Nat Commun* **6**:8568.  
509 doi:10.1038/ncomms9568
- 510 Gonzalez A, Germain RM, Srivastava DS, Filotas E, Dee LE, Gravel D, Thompson PL, Isbell F,  
511 Wang S, Kéfi S, Montoya J, Zelnik YR, Loreau M. 2020. Scaling-up biodiversity-  
512 ecosystem functioning research. *Ecol Lett* **23**:757–776. doi:10.1111/ele.13456
- 513 Harrison SP, Gornish ES, Copeland S. 2015. Climate-driven diversity loss in a grassland  
514 community. *Proc Natl Acad Sci USA* **112**:8672–8677. doi:10.1073/pnas.1502074112
- 515 Hautier Y, Isbell F, Borer ET, Seabloom EW, Harpole WS, Lind EM, MacDougall AS, Stevens  
516 CJ, Adler PB, Alberti J, Bakker JD, Brudvig LA, Buckley YM, Cadotte M, Caldeira MC,  
517 Chaneton EJ, Chu C, Daleo P, Dickman CR, Dwyer JM, Eskelinen A, Fay PA, Firn J,  
518 Hagenah N, Hillebrand H, Iribarne O, Kirkman KP, Knops JMH, La Pierre KJ, McCulley

519 RL, Morgan JW, Pärtel M, Pascual J, Price JN, Prober SM, Risch AC, Sankaran M,  
520 Schuetz M, Standish RJ, Virtanen R, Wardle GM, Yahdjian L, Hector A. 2018. Local loss  
521 and spatial homogenization of plant diversity reduce ecosystem multifunctionality. *Nature*  
522 *Ecology & Evolution* **2**:50–56. doi:10.1038/s41559-017-0395-0

523 Hautier Y, Seabloom EW, Borer ET, Adler PB, Harpole WS, Hillebrand H, Lind EM,  
524 MacDougall AS, Stevens CJ, Bakker JD. 2014. Eutrophication weakens stabilizing effects  
525 of diversity in natural grasslands. *Nature* **508**:521–525. doi:10.1038/nature13014

526 Hautier Y, Tilman D, Isbell F, Seabloom EW, Borer ET, Reich PB. 2015. Anthropogenic  
527 environmental changes affect ecosystem stability via biodiversity. *Science* **348**:336–340.  
528 doi:10.1126/science.aaa1788

529 Hautier Y, Zhang P, Loreau M, Wilcox KR, Seabloom EW, Borer ET, Byrnes JEK, Koerner SE,  
530 Komatsu KJ, Lefcheck JS, Hector A, Adler PB, Alberti J, Arnillas CA, Bakker JD,  
531 Brudvig LA, Bugalho MN, Cadotte M, Caldeira MC, Carroll O, Crawley M, Collins SL,  
532 Daleo P, Dee LE, Eisenhauer N, Eskelinen A, Fay PA, Gilbert B, Hansar A, Isbell F,  
533 Knops JMH, MacDougall AS, McCulley RL, Moore JL, Morgan JW, Mori AS, Peri PL,  
534 Pos ET, Power SA, Price JN, Reich PB, Risch AC, Roscher C, Sankaran M, Schütz M,  
535 Smith M, Stevens C, Tognetti PM, Virtanen R, Wardle GM, Wilfahrt PA, Wang S. 2020.  
536 General destabilizing effects of eutrophication on grassland productivity at multiple  
537 spatial scales. *Nat Commun* **11**:5375. doi:10.1038/s41467-020-19252-4

538 Hector A, Hautier Y, Saner P, Wacker L, Bagchi R, Joshi J, Scherer-Lorenzen M, Spehn EM,  
539 Bazeley-White E, Weilenmann M, Caldeira MC, Dimitrakopoulos PG, Finn JA, Huss-  
540 Danell K, Jumpponen A, Mulder CPH, Palmborg C, Pereira JS, Siamantziouras ASD,  
541 Terry AC, Troumbis AY, Schmid B, Loreau M. 2010. General stabilizing effects of plant

- 542 diversity on grassland productivity through population asynchrony and overyielding.  
543 *Ecology* **91**:2213–2220. doi:10.1890/09-1162.1
- 544 Hu Z, Guo Q, Li S, Piao S, Knapp AK, Ciais P, Li X, Yu G. 2018. Shifts in the dynamics of  
545 productivity signal ecosystem state transitions at the biome-scale. *Ecology letters*  
546 **21**:1457–1466. doi:10.1111/ele.13126
- 547 Huang J, Xue Y, Sun S, Zhang J. 2015. Spatial and temporal variability of drought during 1960–  
548 2012 in Inner Mongolia, north China. *Quaternary International* **355**:134–144.  
549 doi:10.1016/j.quaint.2014.10.036
- 550 Isbell F, Cowles J, Dee LE, Loreau M, Reich PB, Gonzalez A, Hector A, Schmid B. 2018.  
551 Quantifying effects of biodiversity on ecosystem functioning across times and places.  
552 *Ecology Letters* **21**:763–778.
- 553 Isbell F, Craven D, Connolly J, Loreau M, Schmid B, Beierkuhnlein C, Bezemer TM, Bonin C,  
554 Bruelheide H, De Luca E. 2015. Biodiversity increases the resistance of ecosystem  
555 productivity to climate extremes. *Nature* **526**:574–577. doi:10.1038/nature15374
- 556 Isbell F, Gonzalez A, Loreau M, Cowles J, Díaz S, Hector A, Mace GM, Wardle DA, O’Connor  
557 MI, Duffy JE, Turnbull LA, Thompson PL, Larigauderie A. 2017. Linking the influence  
558 and dependence of people on biodiversity across scales. *Nature* **546**:65–72.  
559 doi:10.1038/nature22899
- 560 Jiang L, Wan S, Li L. 2009. Species diversity and productivity: why do results of diversity-  
561 manipulation experiments differ from natural patterns? *Journal of Ecology* **97**:603–608.  
562 doi:10.1111/j.1365-2745.2009.01503.x
- 563 Kang L, Han X, Zhang Z, Sun OJ. 2007. Grassland ecosystems in China: review of current  
564 knowledge and research advancement. *Philosophical Transactions of the Royal Society of*  
565 *London* **362**:997–1008. doi:10.1098/rstb.2007.2029



- 566 Lamy T, Wang S, Renard D, Lafferty KD, Reed DC, Miller RJ. 2019. Species insurance trumps  
567 spatial insurance in stabilizing biomass of a marine macroalgal metacommunity. *Ecology*  
568 e02719. doi:10.1002/ecy.2719
- 569 Lefcheck JS. 2016. piecewiseSEM: Piecewise structural equation modelling in R for ecology,  
570 evolution, and systematics. *Methods Ecol Evol* **7**:573–579. doi:10.1111/2041-210X.12512
- 571 Lehman CL, Tilman D. 2000. Biodiversity, stability, and productivity in competitive  
572 communities. *The American Naturalist* **156**:534–552. doi:10.1086/303402
- 573 Liang M, Liang C, Hautier Y, Wilcox KR, Wang S. 2021. Grazing-induced biodiversity loss  
574 impairs grassland ecosystem stability at multiple scales. *Ecology Letters* **24**:2054–2064.  
575 doi:10.1111/ele.13826
- 576 Ma W, He J, Yang Y, Wang X, Liang C, Anwar M, Zeng H, Fang J, Schmid B. 2010.  
577 Environmental factors covary with plant diversity–productivity relationships among  
578 Chinese grassland sites. *Global Ecology and Biogeography* **19**:233–243.  
579 doi:10.1111/j.1466-8238.2009.00508.x
- 580 Ma Z, Liu H, Mi Z, Zhang Z, Wang Y, Xu W, Jiang L, He J-S. 2017. Climate warming reduces  
581 the temporal stability of plant community biomass production. *Nature Communications*  
582 **8**:15378. doi:10.1038/ncomms15378
- 583 Manning P, Loos J, Barnes AD, Batáry P, Bianchi FJJA, Buchmann N, De Deyn GB, Ebeling A,  
584 Eisenhauer N, Fischer M, Fründ J, Grass I, Isselstein J, Jochum M, Klein AM,  
585 Klingenberg EOF, Landis DA, Lepš J, Lindborg R, Meyer ST, Temperton VM, Westphal  
586 C, Tschardt T. 2019. Transferring biodiversity-ecosystem function research to the  
587 management of ‘real-world’ ecosystems *Advances in Ecological Research*. Elsevier. pp.  
588 323–356. doi:10.1016/bs.aecr.2019.06.009

- 589 McGranahan DA, Hovick TJ, Dwayne ER, Engle DM, Fuhlendorf, Winter SL, Miller JR,  
590 Debinski DM. 2016. Temporal variability in aboveground plant biomass decreases as  
591 spatial variability increases. *Ecology* **97**:555–560. doi:10.1890/15-0906.1
- 592 Newbold T, Hudson LN, Hill SLL, Contu S, Lysenko I, Senior RA, Börger L, Bennett DJ,  
593 Choimes A, Collen B, Day J, De Palma A, Díaz S, Echeverria-Londoño S, Edgar MJ,  
594 Feldman A, Garon M, Harrison MLK, Alhousseini T, Ingram DJ, Itescu Y, Kattge J, Kemp  
595 V, Kirkpatrick L, Kleyer M, Correia DLP, Martin CD, Meiri S, Novosolov M, Pan Y,  
596 Phillips HRP, Purves DW, Robinson A, Simpson J, Tuck SL, Weiher E, White HJ, Ewers  
597 RM, Mace GM, Scharlemann JPW, Purvis A. 2015. Global effects of land use on local  
598 terrestrial biodiversity. *Nature* **520**:45–50. doi:10.1038/nature14324
- 599 Piao S, Ciais P, Huang Y, Shen Z, Peng SS, Li J, Zhou L, Liu H, Ma Y, Ding Y, Friedlingstein P,  
600 Liu C, Tan K, Yu Y, Zhang T, Fang J. 2010. The impacts of climate change on water  
601 resources and agriculture in China. *Nature* **467**:43–51. doi:10.1038/nature09364
- 602 R Core Team. 2013. R: A Language and Environment for Statistical Computing. Vienna, Austria:  
603 R Foundation for Statistical Computing.
- 604 Shipley B. 2013. The AIC model selection method applied to path analytic models compared  
605 using a d-separation test. *Ecology* **94**:560–564. doi:10.1890/12-0976.1
- 606 Smith MD, Knapp AK. 2003. Dominant species maintain ecosystem function with non-random  
607 species loss. *Ecology Letters* **6**:509–517. doi:10.1046/j.1461-0248.2003.00454.x
- 608 Tao S, Fang J, Zhao X, Zhao S, Shen H, Hu H, Tang Z, Wang Z, Guo Q. 2015. Rapid loss of  
609 lakes on the Mongolian Plateau. *Proc Natl Acad Sci USA* **112**:2281–2286.  
610 doi:10.1073/pnas.1411748112
- 611 Thibaut LM, Connolly SR. 2013. Understanding diversity–stability relationships: towards a  
612 unified model of portfolio effects. *Ecology Letters* **16**:140–150. doi:10.1111/ele.12019

- 613 Thorson JT, Scheuerell MD, Olden JD, Schindler DE. 2018. Spatial heterogeneity contributes  
614 more to portfolio effects than species variability in bottom-associated marine fishes. *Proc*  
615 *R Soc B* **285**:20180915. doi:10.1098/rspb.2018.0915
- 616 Tilman D. 1999. The ecological consequences of changes in biodiversity: a search for general  
617 principles. *Ecology* **80**:1455–1474. doi:10.1890/0012-  
618 9658(1999)080[1455:TECOCI]2.0.CO;2
- 619 Tilman D, Isbell F, Cowles JM. 2014. Biodiversity and ecosystem functioning. *Annu Rev Ecol*  
620 *Evol Syst* **45**:471–493. doi:10.1146/annurev-ecolsys-120213-091917
- 621 Tilman D, Reich PB, Knops JMH. 2006. Biodiversity and ecosystem stability in a decade-long  
622 grassland experiment. *Nature* **441**:629–632. doi:10.1038/nature04742
- 623 van der Plas F, Manning P, Soliveres S, Allan E, Scherer-Lorenzen M, Verheyen K, Wirth C,  
624 Zavala MA, Ampoorter E, Baeten L, Barbaro L, Bauhus J, Benavides R, Benneter A,  
625 Bonal D, Bouriaud O, Bruelheide H, Bussotti F, Carnol M, Castagneyrol B, Charbonnier  
626 Y, Coomes DA, Coppi A, Bastias CC, Dawud SM, De Wandeler H, Domisch T, Finér L,  
627 Gessler A, Granier A, Grossiord C, Guyot V, Hättenschwiler S, Jactel H, Jaroszewicz B,  
628 Joly F, Jucker T, Koricheva J, Milligan H, Mueller S, Muys B, Nguyen D, Pollastrini M,  
629 Ratcliffe S, Raulund-Rasmussen K, Selvi F, Stenlid J, Valladares F, Vesterdal L, Zielínski  
630 D, Fischer M. 2016. Biotic homogenization can decrease landscape-scale forest  
631 multifunctionality. *Proc Natl Acad Sci USA* **113**:3557–3562.  
632 doi:10.1073/pnas.1517903113
- 633 Wang S, Lamy T, Hallett LM, Loreau M. 2019. Stability and synchrony across ecological  
634 hierarchies in heterogeneous metacommunities: linking theory to data. *Ecography*  
635 **42**:1200–1211. doi:10.1111/ecog.04290

- 636 Wang S, Loreau M. 2016. Biodiversity and ecosystem stability across scales in metacommunities.  
637 *Ecology Letters* **19**:510–518. doi:10.1111/ele.12582
- 638 Wang S, Loreau M. 2014. Ecosystem stability in space:  $\alpha$ ,  $\beta$  and  $\gamma$  variability. *Ecology Letters*  
639 **17**:891–901. doi:10.1111/ele.12292
- 640 Wang S, Loreau M, Arnoldi J-F, Fang J, Rahman KA, Tao S, de Mazancourt C. 2017. An  
641 invariability-area relationship sheds new light on the spatial scaling of ecological stability.  
642 *Nature Communications* **8**:15211. doi:10.1038/ncomms15211
- 643 Wang Y, Niu X, Zhao L, Liang C, Miao B, Zhang Q, Zhang J, Schmid B, Ma W. 2020. Biotic  
644 stability mechanisms in Inner Mongolian grassland. *Proceedings of the Royal Society B:*  
645 *Biological Sciences* **287**:20200675. doi:10.1098/rspb.2020.0675
- 646 Wilcox KR, Tredennick AT, Koerner SE, Grman E, Hallett LM, Avolio ML, La Pierre KJ,  
647 Houseman GR, Isbell F, Johnson DS, Alatalo JM, Baldwin AH, Bork EW, Boughton EH,  
648 Bowman WD, Britton AJ, Cahill JF, Collins SL, Du G, Eskelinen A, Gough L, Jentsch A,  
649 Kern C, Klanderud K, Knapp AK, Kreyling J, Luo Y, McLaren JR, Megonigal P,  
650 Onipchenko V, Prevéy J, Price JN, Robinson CH, Sala OE, Smith MD, Soudzilovskaia  
651 NA, Souza L, Tilman D, White SR, Xu Z, Yahdjian L, Yu Q, Zhang P, Zhang Y. 2017.  
652 Asynchrony among local communities stabilises ecosystem function of metacommunities.  
653 *Ecology Letters* **20**:1534–1545. doi:10.1111/ele.12861
- 654 Wu J, Zhang Q, Li A, Liang C. 2015. Historical landscape dynamics of Inner Mongolia: patterns,  
655 drivers, and impacts. *Landscape Ecology* **30**:1579–1598. doi:10.1007/s10980-015-0209-1
- 656 Xu Z, Ren H, Cai J, Wang R, Li M-H, Wan S, Han X, Lewis BJ, Jiang Y. 2014. Effects of  
657 experimentally-enhanced precipitation and nitrogen on resistance, recovery and resilience  
658 of a semi-arid grassland after drought. *Oecologia* **176**:1187–1197. doi:10.1007/s00442-  
659 014-3081-9

- 660 Xu Z, Ren H, Li M, van Ruijven J, Han X, Wan S, Li H, Yu Q, Jiang Y, Jiang L. 2015.  
661 Environmental changes drive the temporal stability of semi-arid natural grasslands  
662 through altering species asynchrony. *Journal of Ecology* **103**:1308–1316.  
663 doi:10.1111/1365-2745.12441
- 664 Yachi S, Loreau M. 1999. Biodiversity and ecosystem productivity in a fluctuating environment:  
665 the insurance hypothesis. *Proc Natl Acad Sci USA* **96**:1463–1468.  
666 doi:10.1073/pnas.96.4.1463
- 667 Yang H, Jiang L, Li L, Li A, Wu M, Wan S. 2012. Diversity-dependent stability under mowing  
668 and nutrient addition: evidence from a 7-year grassland experiment. *Ecology Letters*  
669 **15**:619–626. doi:10.1111/j.1461-0248.2012.01778.x
- 670 Zhang B, Zhu J, Pan Q, Liu Y, Chen S, Chen D, Yan Y, Dou S, Han X. 2017. Grassland species  
671 respond differently to altered precipitation amount and pattern. *Environmental and*  
672 *Experimental Botany* **137**:166–176. doi:10.1016/j.envexpbot.2017.02.006
- 673 Zhang Y, Feng J, Loreau M, He N, Han X, Jiang L. 2019. Nitrogen addition does not reduce the  
674 role of spatial asynchrony in stabilising grassland communities. *Ecology Letters* **25**:2958–  
675 2969. doi:10.1111/ele.13212
- 676

677 **Table 1.** Notation summary for climatic factors, species diversity indices, (temporal) coefficients  
 678 of variation (CVs, inverse of temporal stabilities) and synchronies (inverse of asynchronies)  
 679 across spatial scales and hierarchical levels of ecological organization. Details for estimating  
 680 dominant-species components of CVs and synchronies can be found in Supplementary file 2.  
 681

| Symbol                                                           | Description                                                                                                                                                                                                                                                                                                |
|------------------------------------------------------------------|------------------------------------------------------------------------------------------------------------------------------------------------------------------------------------------------------------------------------------------------------------------------------------------------------------|
| <b>Climatic factors</b>                                          |                                                                                                                                                                                                                                                                                                            |
| $MGT$                                                            | Cross-site averaged temporal mean growing-season temperature                                                                                                                                                                                                                                               |
| $MGP$                                                            | Cross-site averaged temporal mean growing-season precipitation                                                                                                                                                                                                                                             |
| $CV_T^L$                                                         | Local-scale temporal CV of (growing-season) temperature                                                                                                                                                                                                                                                    |
| $CV_P^L$                                                         | Local-scale temporal CV of (growing-season) precipitation                                                                                                                                                                                                                                                  |
| $\varphi_T^{L \rightarrow A}$                                    | Spatial synchronous dynamic of (growing-season) temperature                                                                                                                                                                                                                                                |
| $\varphi_P^{L \rightarrow A}$                                    | Spatial synchronous dynamic of (growing-season) precipitation                                                                                                                                                                                                                                              |
| $CV_T^A$                                                         | Large-scale temporal CV of (growing-season) temperature                                                                                                                                                                                                                                                    |
| $CV_P^A$                                                         | Large-scale temporal CV of (growing-season) precipitation                                                                                                                                                                                                                                                  |
| <b>Biodiversity indices</b>                                      |                                                                                                                                                                                                                                                                                                            |
| $N^\alpha$ or $N_d^\alpha$                                       | Alpha species richness or alpha dominant species richness                                                                                                                                                                                                                                                  |
| $N^\beta$ or $N_d^\beta$                                         | Beta species richness or beta dominant species richness                                                                                                                                                                                                                                                    |
| $N^\gamma$ or $N_d^\gamma$                                       | Gamma species richness or gamma dominant species richness                                                                                                                                                                                                                                                  |
| $D^\alpha$ or $D_d^\alpha$                                       | Alpha effective species richness or alpha dominant effective species richness                                                                                                                                                                                                                              |
| $D^\beta$ or $D_d^\beta$                                         | Beta effective species richness or beta dominant effective species richness                                                                                                                                                                                                                                |
| $D^\gamma$ or $D_d^\gamma$                                       | Gamma effective species richness or gamma dominant effective species richness                                                                                                                                                                                                                              |
| <b>Stability and synchrony</b>                                   |                                                                                                                                                                                                                                                                                                            |
| $CV^{P,L}$ or $CV_d^{P,L}$                                       | <b>Local-scale population CV</b> or dominant-species local-scale population CV, defined as the weighted average local-scale population temporal CV estimated with all species or only dominant species within local-scale communities                                                                      |
| $\varphi^{P \rightarrow C,L}$ or $\varphi_d^{P \rightarrow C,L}$ | <b>Local-scale species synchrony</b> or local-scale dominant species synchrony, defined as the weighted average synchronous dynamics among local-scale populations of all species or only dominant species within local-scale communities                                                                  |
| $CV^{C,L}$ or $CV_d^{C,L}$                                       | <b>Local-scale community CV</b> or dominant-species local-scale community CV, defined as the weighted average community temporal CV estimated with all species or only dominant species                                                                                                                    |
| $\varphi^{C,L \rightarrow A}$ or $\varphi_d^{C,L \rightarrow A}$ | <b>Community spatial synchrony</b> or dominant-species community spatial synchrony, defined as the all-species or dominant-species estimates of weighted average spatial synchronous dynamics among local-scale communities                                                                                |
| $\varphi^{P,L \rightarrow A}$ or $\varphi_d^{P,L \rightarrow A}$ | <b>Species spatial synchrony</b> or dominant species spatial synchrony, defined as the all-species and dominant-species estimates of weighted average spatial synchronous dynamics among local-scale populations                                                                                           |
| $CV^{P,A}$ or $CV_d^{P,A}$                                       | <b>Large-scale population CV</b> or dominant-species large-scale population CV, defined as the all-species and dominant-species estimates of weighted average population temporal CV at larger spatial scales                                                                                              |
| $\varphi^{P \rightarrow C,A}$ or $\varphi_d^{P \rightarrow C,A}$ | <b>Large-scale species synchrony</b> or large-scale dominant species synchrony, defined as the all-species and dominant-species estimates of weighted average synchronous dynamics among large-scale populations                                                                                           |
| $CV^{C,A}$ or $CV_{d,C}^{C,A}$<br>and $CV_{d,P}^{C,A}$           | <b>Large-scale community CV</b> or its dominant-species counterparts estimated via aggregating local-scale communities ( $CV_{d,C}^{C,A} = \varphi_d^{C,L \rightarrow A} \times CV_d^{C,L}$ ) or organizing large-scale populations ( $CV_{d,P}^{C,A} = \varphi_d^{P \rightarrow C,A} \times CV_d^{P,A}$ ) |

682

683 **Figure legends**

684

685 **Figure 1.** Diagrams showing large-scale communities with different scenarios of species  
686 diversity across spatial scales (a) and the large-scale community variability (estimated with  
687 coefficients of variation, CV, inverse of temporal stability) upscaled from local-scale population  
688 variability via local-scale communities (Pathway I, red arrows on the left side) and large-scale  
689 populations (Pathway II, blue arrows on the right side) under different scenarios (b; for  
690 terminology see Table 1). The subfigure (b) also shows theoretically proposed degrees of  
691 variabilities and synchronies (inverse of asynchrony) across ecological hierarchical levels under  
692 different scenarios (Thibaut and Connolly, 2013; Wang et al., 2019, 2020; Wang and Loreau,  
693 2016, 2014). Mathematical derivations can be found in Supplementary file 2.

694

695 **Figure 2.** Geographical distribution of surveyed sites with site numbers (a) and a simplified case  
696 (7-site) for illustrating construction of large-scale communities aggregating two local-scale  
697 communities (b). In subfigure (a), red circles represent sites included in constructing large-scale  
698 communities (two sites, 2 and 23, with grey circles were excluded because they were monitored  
699 for only three years). The subfigure (b) shows a simplified case illustrating the construction of  
700 large-scale communities with a random resampling method without repeatedly using the same  
701 site to ensure constructed large-scale communities are independent between each other (see  
702 Materials and Methods for details).

703

704 **Figure 3.** The large-scale community (a–d), local-scale community (e–f) and large-scale  
705 population (g–h) coefficients of variation (CVs, inverse of temporal stability) in relation to their  
706 hierarchical components. Solid black lines represent significant ( $P < 0.05$ ) and marginally

707 significant ( $P < 0.10$ ) relationships and dashed grey lines represent non-significant ( $P > 0.10$ )  
708 relationships (see Materials and Methods for details and Table 1 for terminology). Dataset, code  
709 and relevant results can also be found in Figshare at  
710 <https://doi.org/10.6084/m9.figshare.16903309>.

711  
712 **Figure 4.** Diagrams of final structural equation models (SEMs) relating the large-scale  
713 community coefficient of variation (CV, inverse of temporal stability) to all-species (a) and  
714 dominant-species (b) measures of CVs and synchronies (inverse of asynchronies) at lower  
715 hierarchical levels of ecological organization and to species diversity indices and climatic factors.  
716 These diagrams combined pathways of local-scale population via local-scale community  
717 (upscaling pathway I on the left side with red arrows) and via large-scale population upscaling  
718 (upscaling pathway II on the right side with blue arrows) to the large-scale community (details of  
719 path analyses and initial and final SEMs that separately considering different upscaling pathways  
720 can be found in Figure 4–source data 1–2 and Figure 4–figure supplement 1–5). Solid and dashed  
721 arrows, respectively, represent examined positive and negative paths (see Figure 4–source data  
722 1–2 for details). Arrows have also been scaled in relation to the strength of the relationship with  
723 numbers showing the mean values the standardized path coefficients. In addition, for all-species  
724 measures (a), mean values of CVs and synchronies are shown in brackets. The significance level  
725 of each path is indicated by \* when  $P < 0.05$  or # when  $P < 0.10$  (see Materials and Methods for  
726 details). Dataset, code and relevant results can also be found in Figshare  
727 <https://doi.org/10.6084/m9.figshare.16903309>.

728  
729 **Figure 5.** Coefficients of variation (CVs, inverse of temporal stability) and synchronies (inverse  
730 of asynchrony) across spatial scales in relation to species diversity (effective species richness, a–



731 g) and local-scale species synchrony in relation to local-scale precipitation variability (h). Solid  
732 black lines represent significant ( $P < 0.05$ ) and marginally significant ( $P < 0.10$ ) relationships and  
733 dashed grey lines represent non-significant ( $P > 0.10$ ) relationships (see Materials and Methods  
734 for details). Dataset, code and relevant results can also be found in Figshare  
735 <https://doi.org/10.6084/m9.figshare.16903309>.

736  
737 **Figure 6.** Diagrams of structural equation models (SEMs) examining theoretically proposed  
738 impacts of species diversity (species richness, a, and effective species richness, b) on the large-  
739 scale community coefficient of variation (CV, inverse of temporal stability) and its hierarchical  
740 components. These diagrams combined local-scale population via local-scale community  
741 (upscaling pathway I on the left side with red arrows) and via large-scale population (upscaling  
742 pathway II on the right side with blue arrows) upscaling to the large-scale community (details of  
743 separately considering different upscaling pathways can be found in Figure 6–source data 1 and  
744 Figure 6–figure supplement 1). Colored and grey arrows represent significant (or marginally  
745 significant) and non-significant paths, respectively. Solid and dashed arrows, respectively,  
746 represent examined positive and negative paths (Figure 6–source data 1). Arrows have also been  
747 scaled in relation to the strength of the relationship with numbers showing the mean values the  
748 standardized path coefficients. The significance level of each path is indicated by \* when  $P <$   
749  $0.05$ , # when  $P < 0.10$  or n.s. (non-significant) when  $P > 0.10$  (see Materials and Methods for  
750 details). Dataset, code and relevant results can also be found in Figshare  
751 <https://doi.org/10.6084/m9.figshare.16903309>.

752

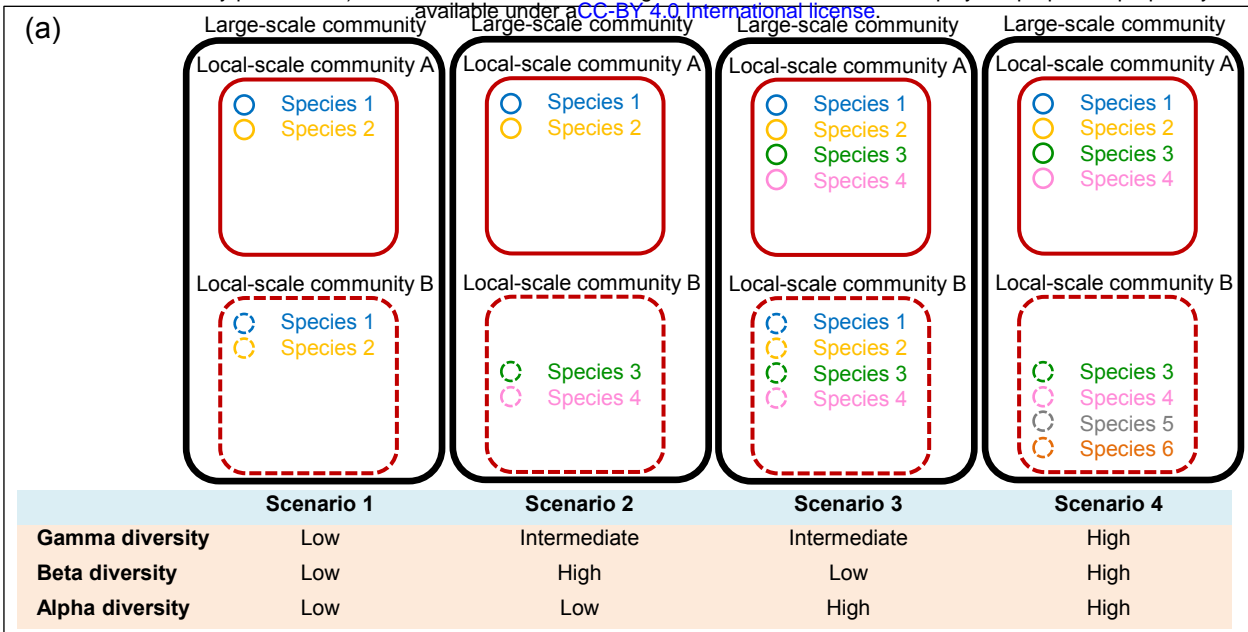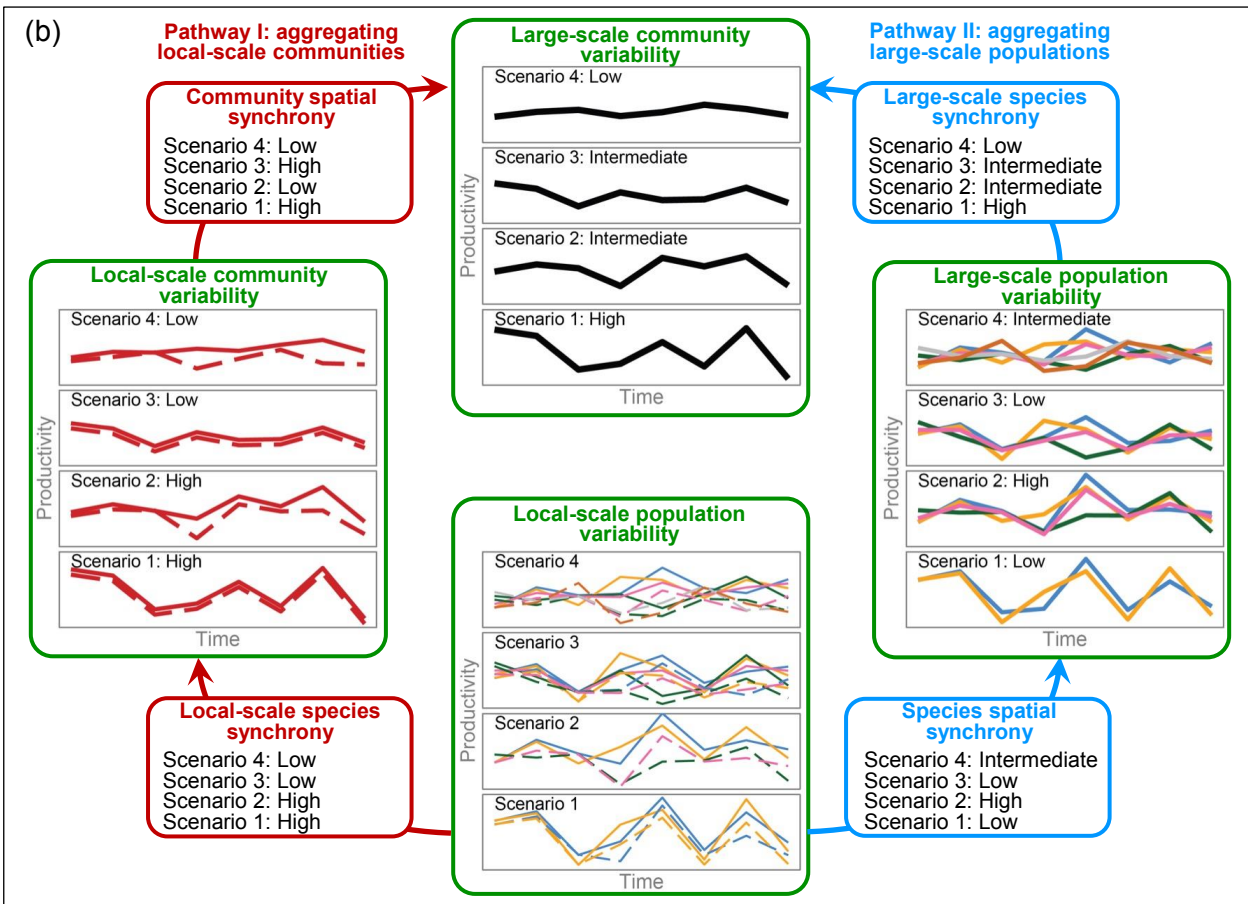

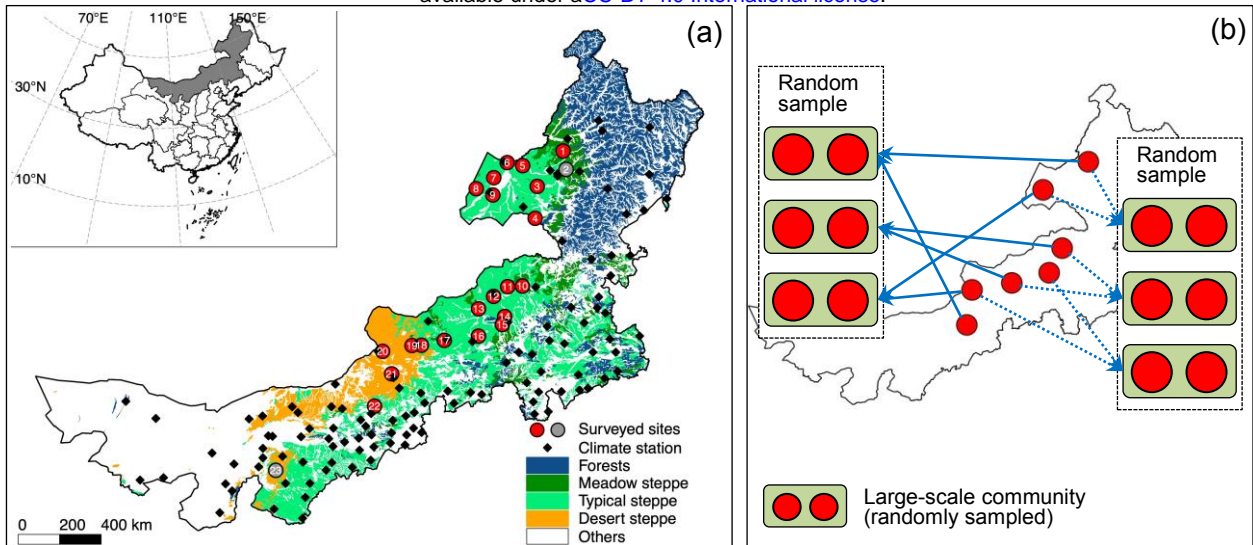

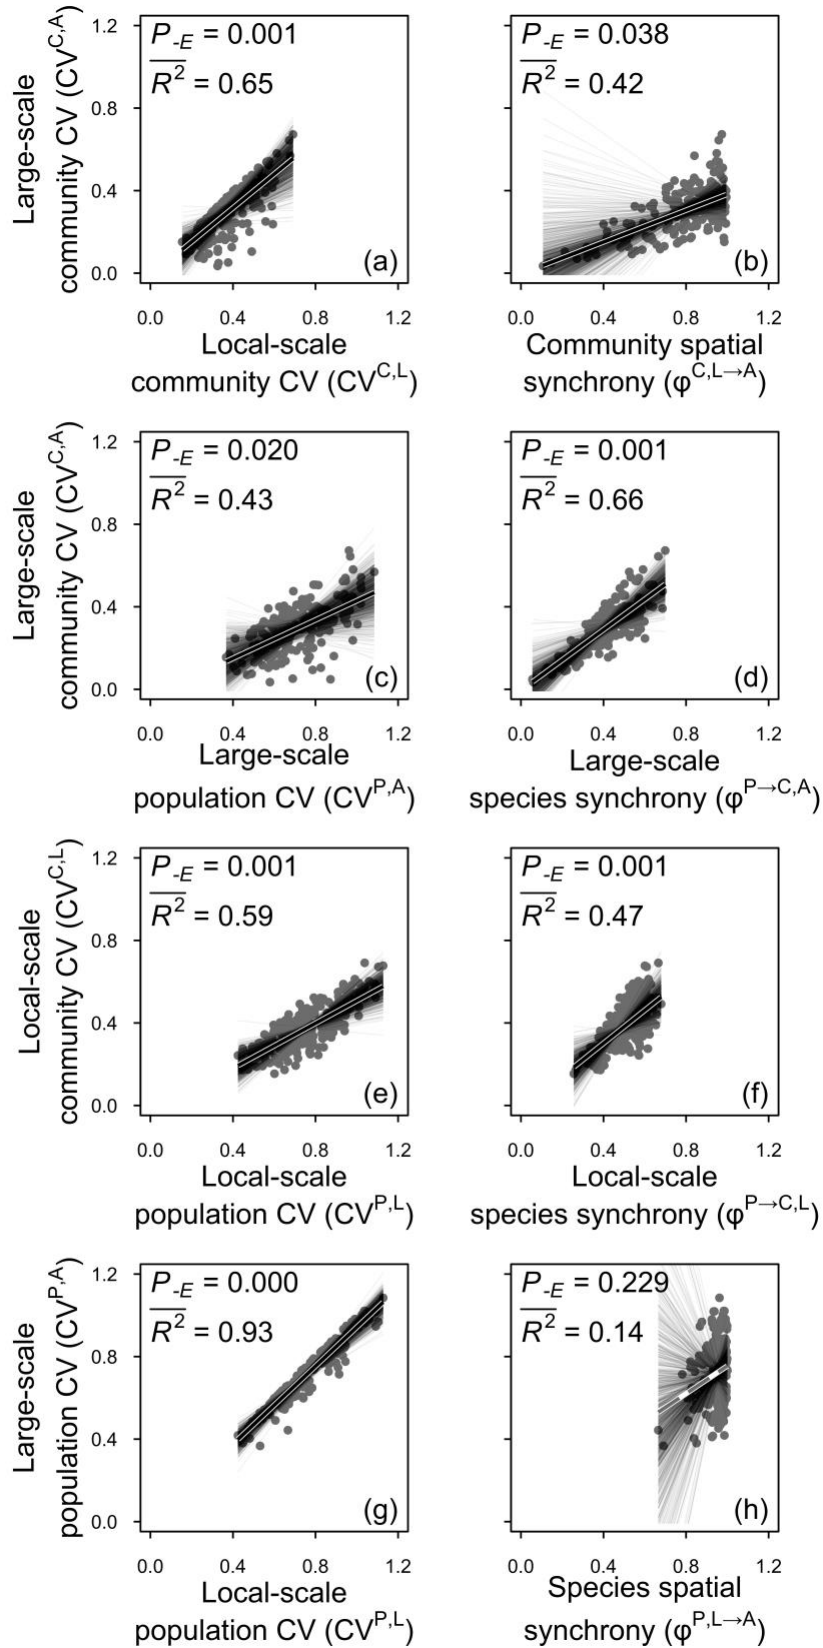

bioRxiv preprint doi: <https://doi.org/10.1101/2021.10.31.466650>; this version posted November 3, 2021. The copyright holder for this preprint (which was not certified by peer review) is the author/funder, who has granted bioRxiv a license to display the preprint in perpetuity. It is made available under aCC-BY 4.0 International license.

Pathway I, aggregating local-scale communities:  
 $\bar{C} = 22.08$ ,  $DF = 22$ ,  $\overline{AICc} = -86.80$

Pathway II, aggregating large-scale populations:  
 $\bar{C} = 14.88$ ,  $DF = 14$ ,  $\overline{AICc} = -184.42$

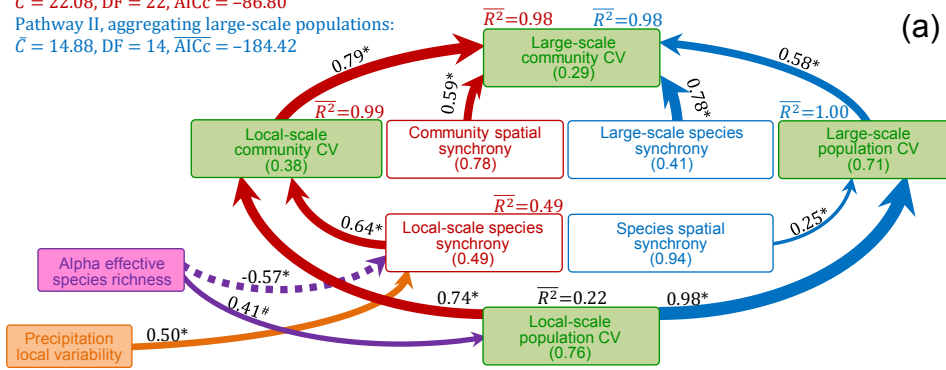

Pathway I, aggregating local-scale communities:  
 $\bar{C} = 22.61$ ,  $DF = 18$ ,  $\overline{AICc} = -155.37$

Pathway II, aggregating large-scale populations:  
 $\bar{C} = 27.78$ ,  $DF = 18$ ,  $\overline{AICc} = -172.60$

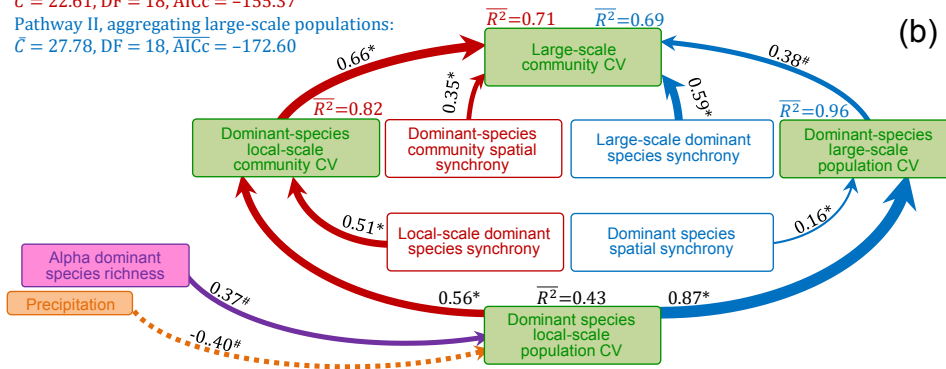

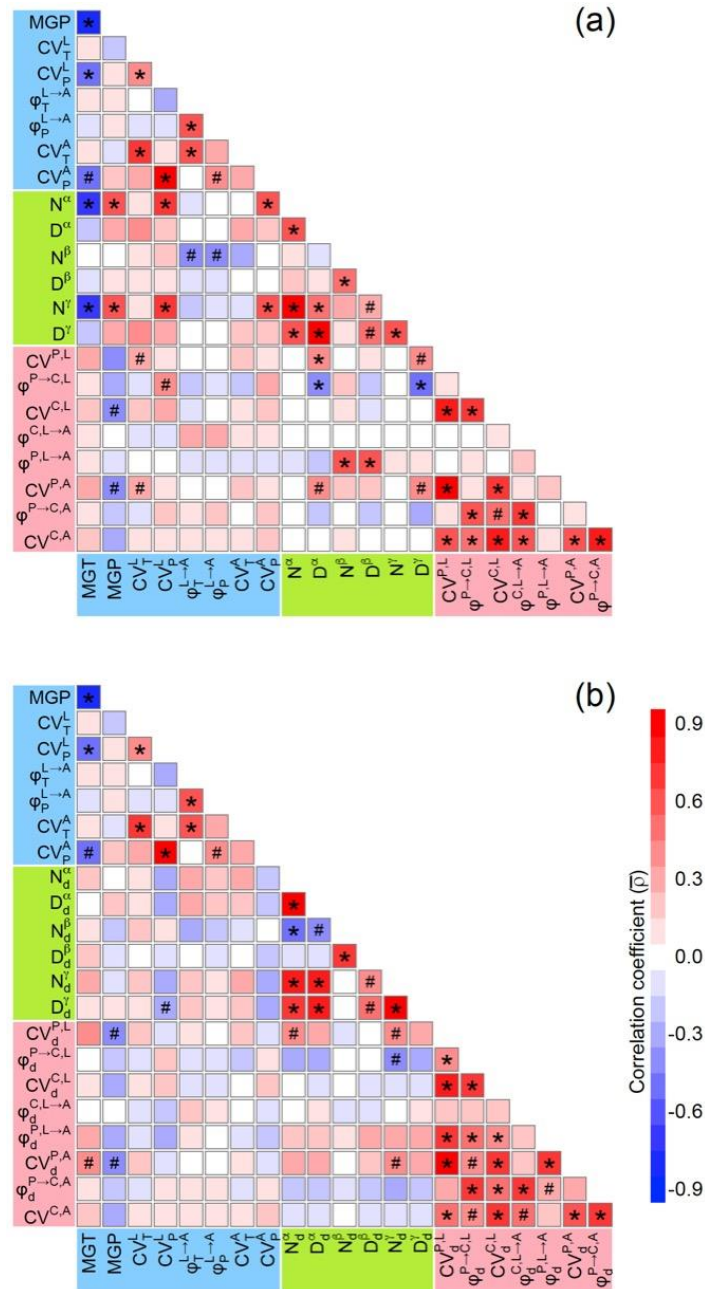

1  
2  
3 **Figure 4–figure supplement 1.** Correlation matrices for climatic factors, species diversity  
4 indices, coefficients of variation (CVs, inverse of temporal stabilities) and synchronies (inverse  
5 of asynchronies) estimated with all species (a) and only dominant species (b) by considering a 2-  
6 local-community scenario (see Figure 2b for a simplified case). Significant and marginally  
7 significant correlations are marked with \* ( $P < 0.05$ ) and # ( $P < 0.10$ ), respectively (see Materials  
8 and Methods for details). Symbols and descriptions can be found in Table 1. Dataset, code and  
9 relevant results can also be found in Figshare <https://doi.org/10.6084/m9.figshare.16903309>.  
10



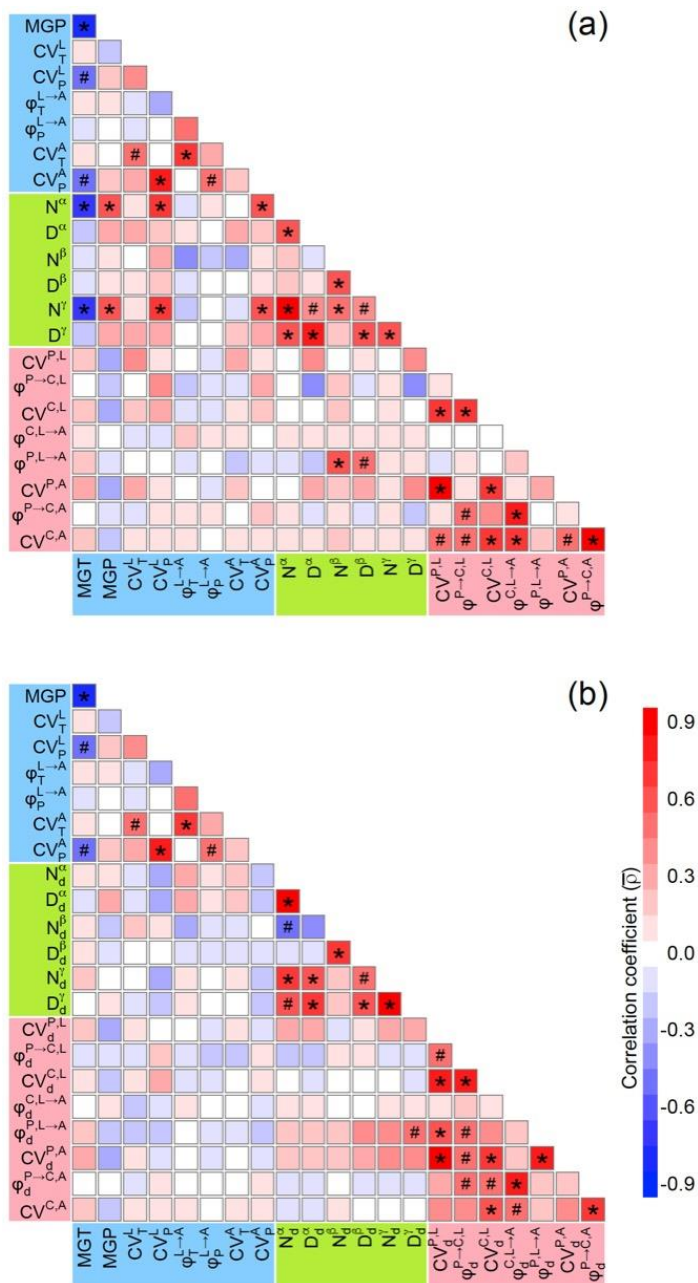

1  
2  
3 **Figure 4—figure supplement 2.** Correlation matrices for climatic factors, species diversity  
4 indices, coefficients of variation (CVs, inverse of temporal stabilities) and synchronies (inverse  
5 of asynchronies) estimated with all species (a) and only dominant species (b) by considering a 3-  
6 local-community scenario (similar sampling as in Figure 2b, but with seven groups of three sites  
7 per sample). Significant and marginally significant correlations are marked with \* ( $P < 0.05$ ) and  
8 # ( $P < 0.10$ ), respectively (see Materials and Methods for details). Symbols and descriptions can  
9 be found in Table 1. Potentially owing to the small sample size ( $n = 7$ ) of the 3-local-community  
10 scenario, many significant (or marginally significant) correlations showed in the 2-local-  
11 community scenario ( $n = 10$ , Figure 4—figure supplement 1) were non-significant. Thus, we did  
12 not further analyze the 3-local-community scenario. Dataset, code and relevant results can also be  
13 found in Figshare <https://doi.org/10.6084/m9.figshare.16903309>.

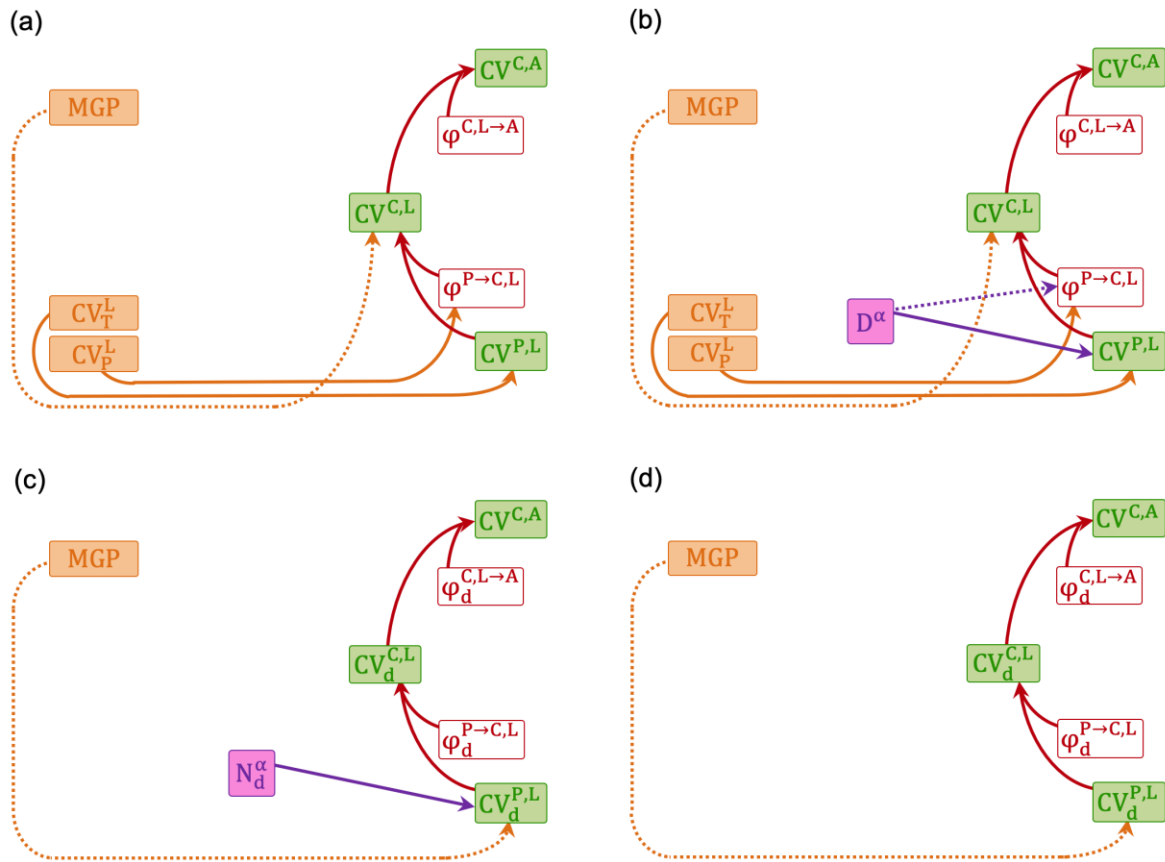

1  
2  
3 **Figure 4–figure supplement 3.** Initial structural equation models (SEMs) relating the large-scale  
4 community coefficient of variation ( $CV^{C,A}$ , inverse of temporal stability) to its hierarchical  
5 components, species diversity indices and climatic factors using the upscaling pathway of  
6 aggregating local-scale communities (pathway I). These models considered CVs and synchronies  
7 (inverse of asynchronies) estimated with all species (a and b) or only dominant species (c and d).  
8 In addition, they also considered two alternative species diversity indices, species richness ( $N$ , a  
9 and c) and effective species richness ( $D$ , b and d). Solid and dashed arrows represent significant  
10 (or marginally significant) positive and negative correlation relationships, respectively (Figure 4–  
11 figure supplement 1). Because (b) includes all paths of (a) and (c) includes all paths of (d), only  
12 the models shown in (b, Figure 4–figure supplement 5a) and (c, Figure 4–figure supplement 5c)  
13 are further analyzed with SEMs (Figure 4–source data–1A–1B) and general linear models (Figure  
14 4–source data–2A–2B). Symbols and descriptions can be found in Table 1.



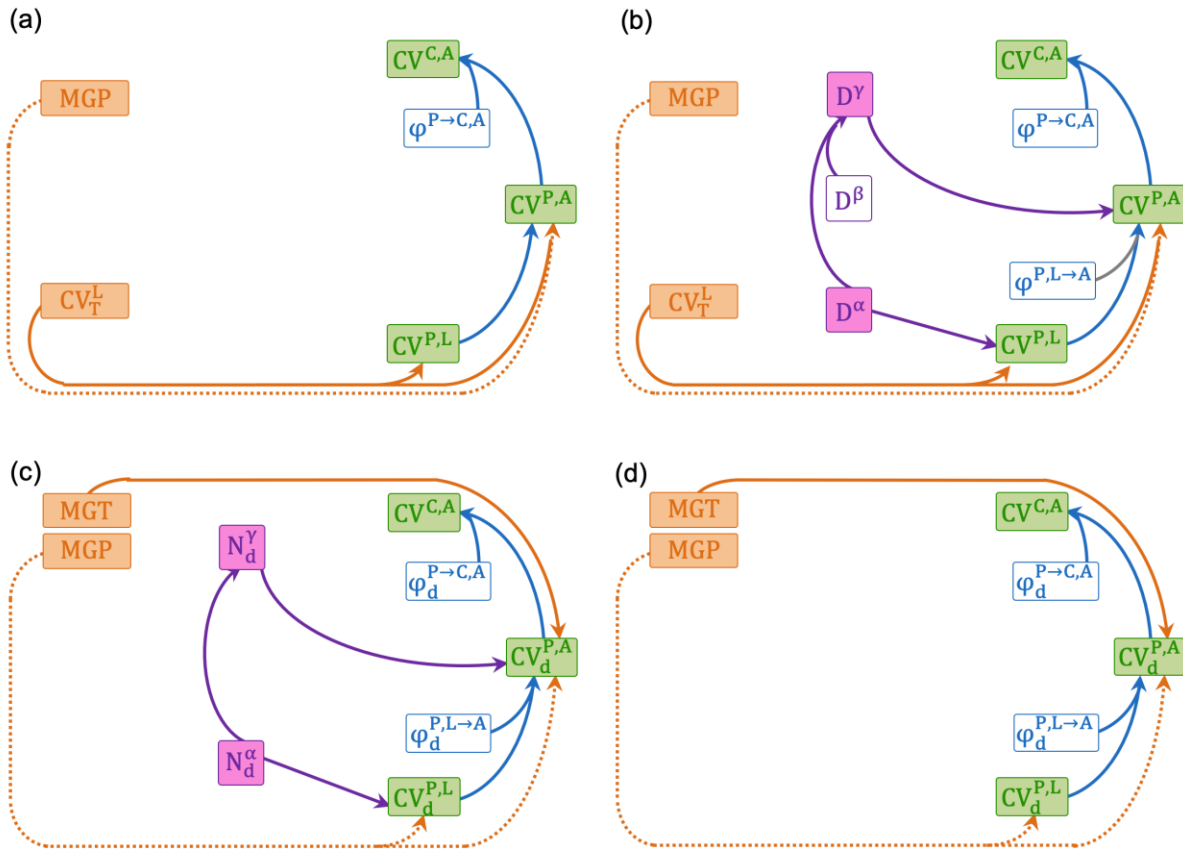

1  
2  
3 **Figure 4–figure supplement 4.** Initial structural equation models (SEMs) relating the large-scale  
4 community coefficient of variation ( $CV^{C,A}$ , inverse of temporal stability) to its hierarchical  
5 components, species diversity indices and climatic factors using the upscaling pathway of  
6 organizing large-scale populations (pathway II). These models considered CVs and synchronies  
7 (inverse of asynchronies) estimated with all species (a and b) or only dominant species (c and d).  
8 In addition, they also consider two alternative species diversity indices, species richness ( $N$ , a and  
9 c) and effective species richness ( $D$ , b and d). Solid and dashed color arrows represent significant  
10 (or marginally significant) positive and negative correlation relationships, respectively (Figure 4–  
11 figure supplement 1). Grey solid arrow (large-scale population CV in relation to species spatial  
12 synchrony, b) represents non-significant positive correlation relationship, which is added in the  
13 initial structure equation model because it is theoretically proposed important (Wang et al., 2019).  
14 Because (b) includes all paths of (a) and (c) includes all paths of (d), only the models shown in (b,  
15 Figure 4–figure supplement 5e) and (c, Figure 4–figure supplement 5g) are further analyzed with  
16 SEMs (Figure 4–source data–1C–1D) and general linear models (Figure 4–source data–2C–2D).  
17 Symbols and descriptions can be found in Table 1.

18  
19 **References**

20 Wang S, Lamy T, Hallett LM, Loreau M. 2019. Stability and synchrony across ecological  
21 hierarchies in heterogeneous metacommunities: linking theory to data. *Ecography*  
22 **42**:1200–1211. doi:10.1111/ecog.04290  
23

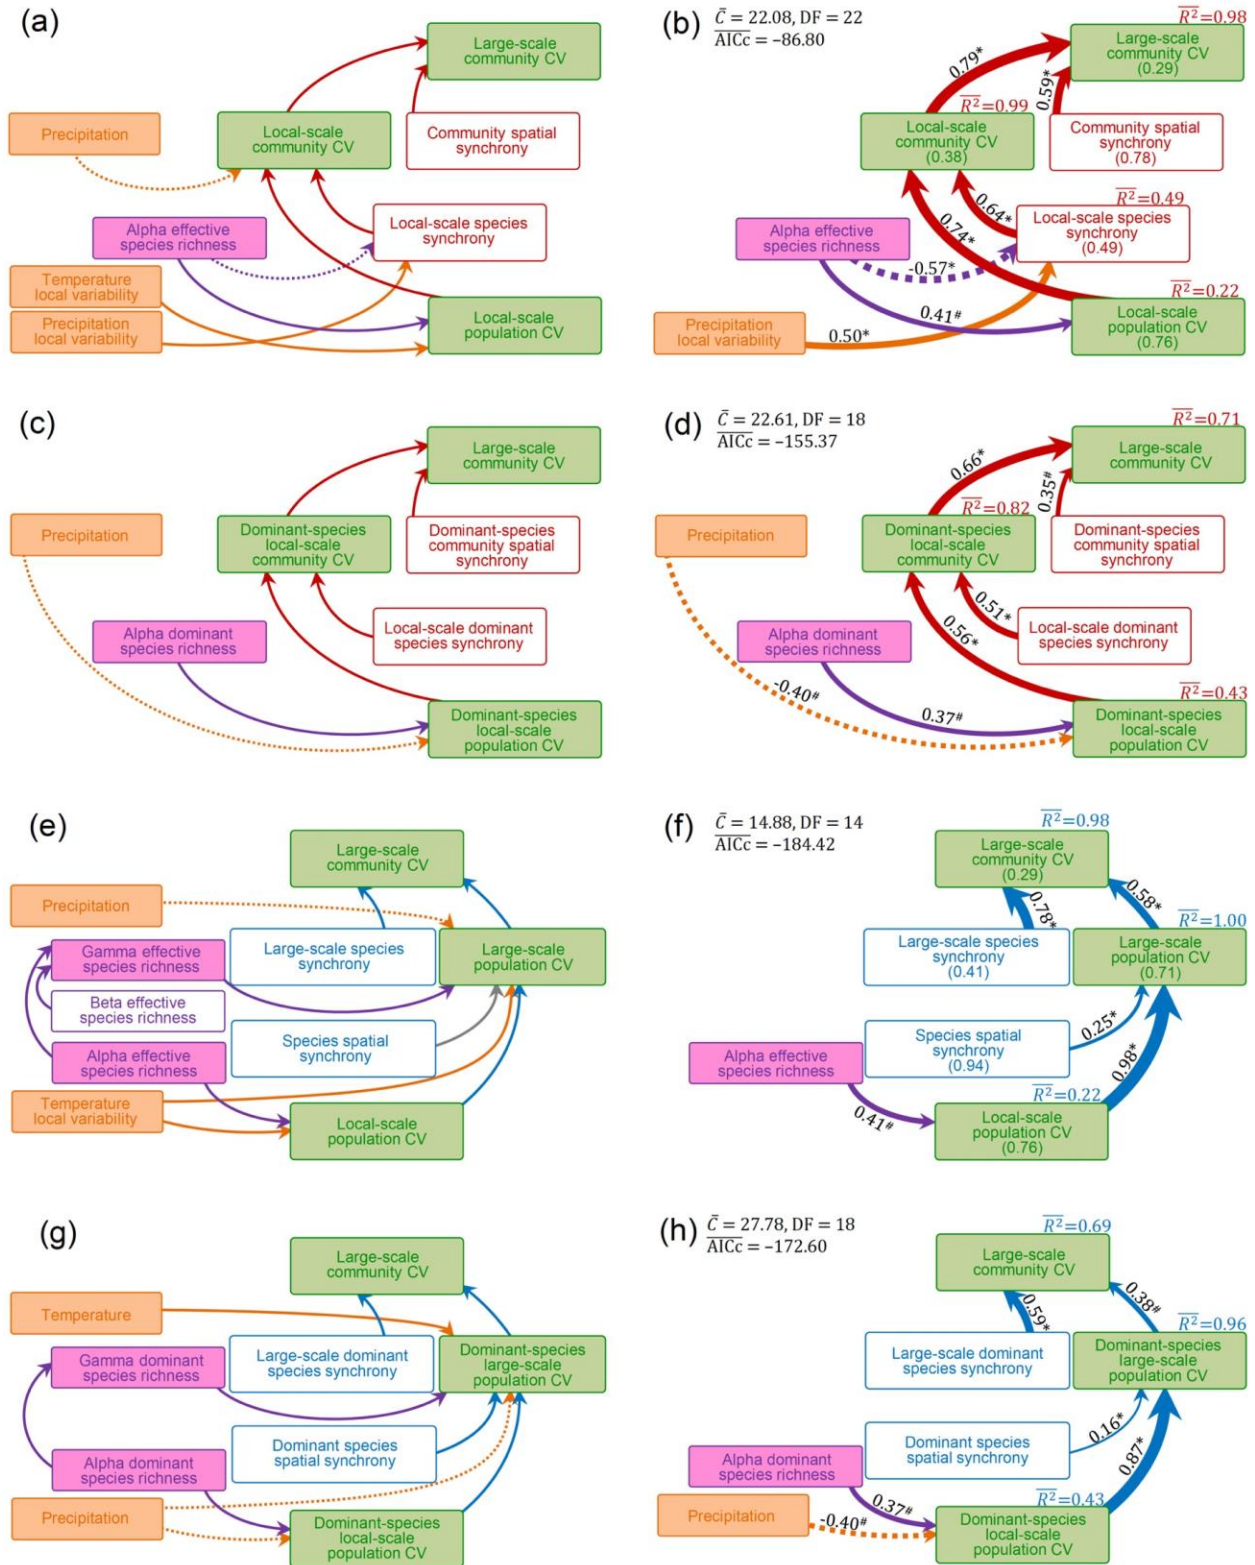

1  
2  
3 **Figure 4—figure supplement 5.** Initial (a, c, e and g) and final (b, d, f and h) structural equation  
4 models (SEMs) relating the large-scale community coefficient of variation (CV, inverse of  
5 temporal stability) to CVs and synchronies (inverse of asynchronies) at lower hierarchical levels

6 of ecological organization and to species diversity indices estimated with all species (a, b, e and  
7 f) and only dominant species (c, d, g and h), as well as climatic factors. These SEMs separately  
8 considered the upscaling pathways of aggregating local-scale community (pathway I, a, b, c and  
9 d) or organizing large-scale population (pathway II, e, f, g and h). In initial SEMs (a, c, e and g,  
10 which can also be found in Figure 4–figure supplement 3b–3c and Figure 4–figure supplement  
11 4b–4c), colored and grey arrows respectively represent significant (or marginal significant) and  
12 non-significant paths and solid and dashed arrows respectively represent positive and negative  
13 paths (see Figure 4–figure supplement 1 for detail). In final SEMs (b, d, f and h), solid and  
14 dashed colored arrows respectively represent examined positive and negative paths (Figure 4–  
15 source data 1–2), which have also been scaled in relation to the strength of the relationship with  
16 numbers showing the mean values the standardized path coefficients.  $\overline{R^2}$  values are mean values  
17 of proportion of variance explained by dependent variables in the model. In addition, in the final  
18 SEM for all-species measures (b and f), mean values of CVs and synchronies have been shown in  
19 brackets. The significance level of each path is indicated by \* when  $P < 0.05$  or # when  $P < 0.10$   
20 (see Materials and Methods for details). Diagrams of final SEMs combining different upscaling  
21 pathways can be found in Figure 4. Dataset, code and relevant results can also be found in  
22 Figshare <https://doi.org/10.6084/m9.figshare.16903309>.  
23

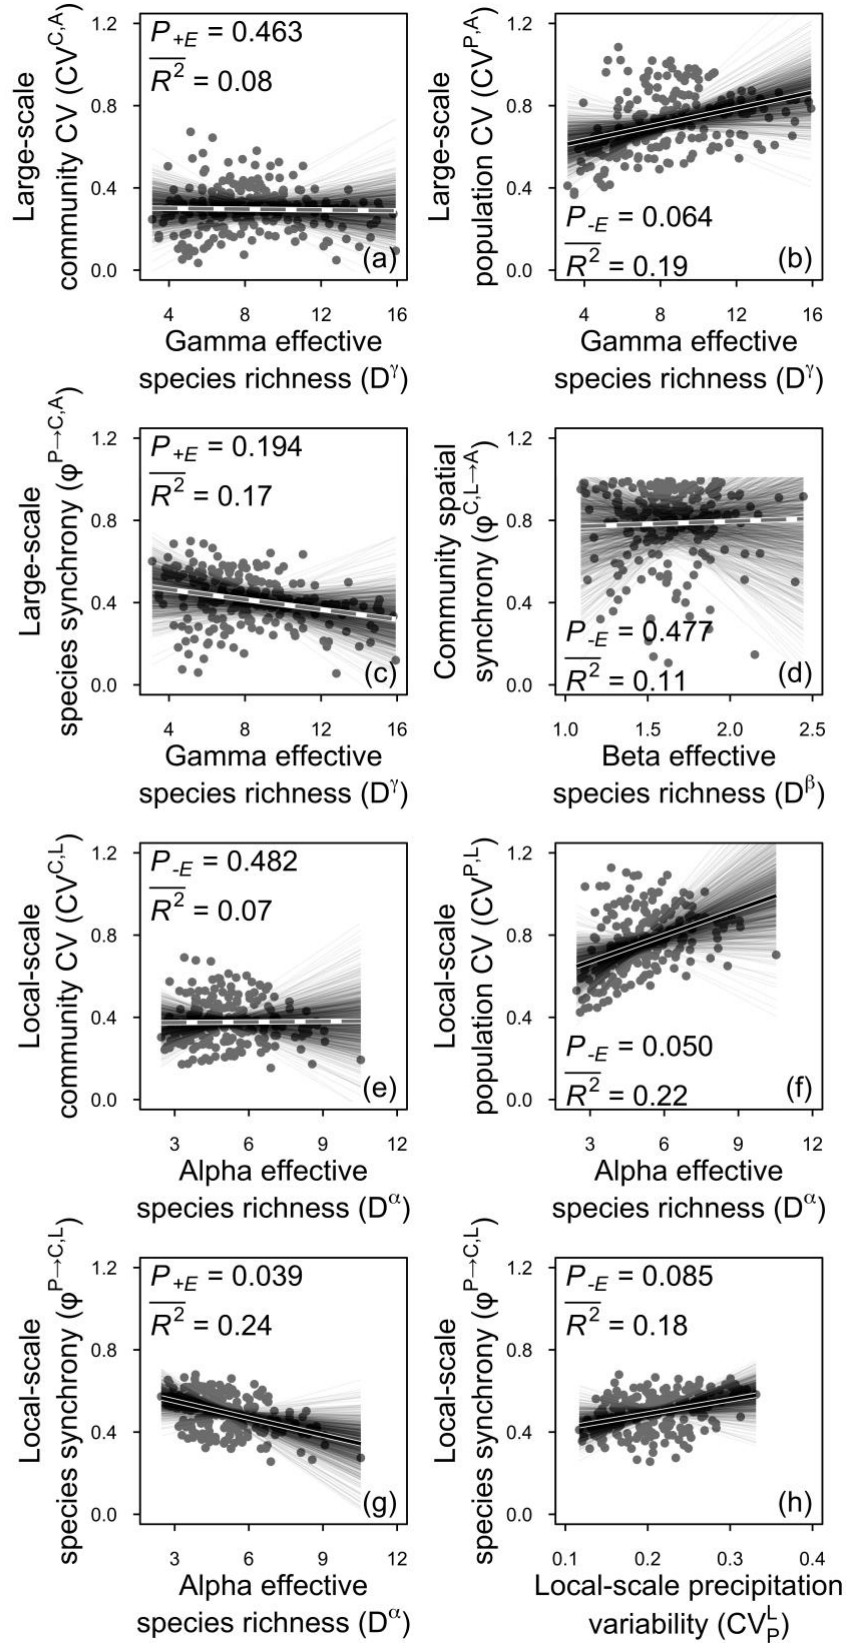





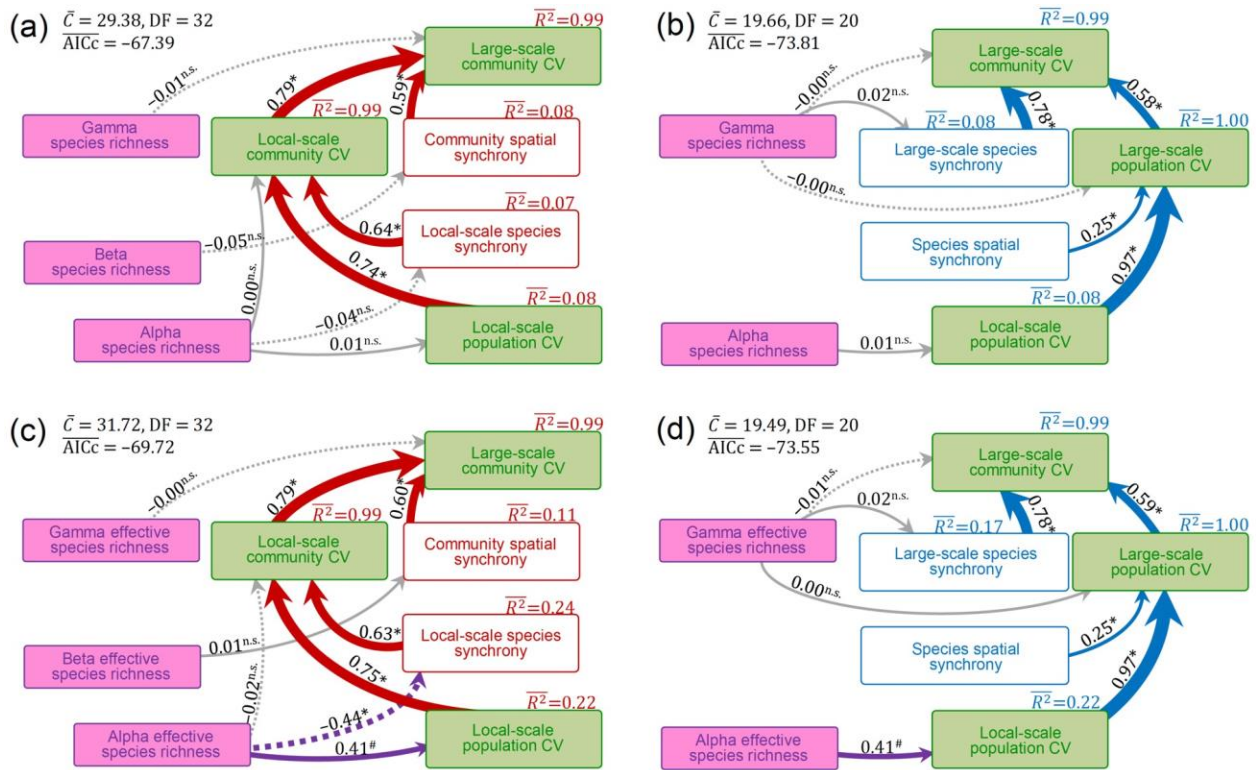

1  
2  
3 **Figure 6–figure supplement 1.** Diagrams of structural equation models (SEMs) examining the  
4 theoretically proposed impacts of species diversity (species richness, a–b, and effective species  
5 richness, c–d) on the large-scale community coefficient of variation (CV, inverse of temporal  
6 stability) and its hierarchical components with separately considering the upscaling pathways of  
7 aggregating local-scale communities (pathway I, a and c) and organizing large-scale populations  
8 (pathway II, b and d). Details can also be found in Figure 6–source data 1. Colored and grey  
9 arrows represent significant (or marginal significant) and non-significant paths, respectively.  
10 Solid and dashed arrows, respectively, represent examined positive and negative paths (Figure 6–  
11 source data 1). Arrows have also been scaled in relation to the strength of the relationship with  
12 numbers showing the mean values the standardized path coefficients. The significance level of  
13 each path is indicated by \* when  $P < 0.05$ , # when  $P < 0.10$  or n.s. (non-significant) when  $P >$   
14  $0.10$  (see Materials and Methods for details). Diagrams of SEMs combining different upscaling  
15 pathways can be found in Figure 6. Dataset, code and relevant results can also be found in  
16 Figshare <https://doi.org/10.6084/m9.figshare.16903309>.  
17

1 **Supplementary file 1**  
2 **Time series of plant species biomass in each surveyed site**  
3

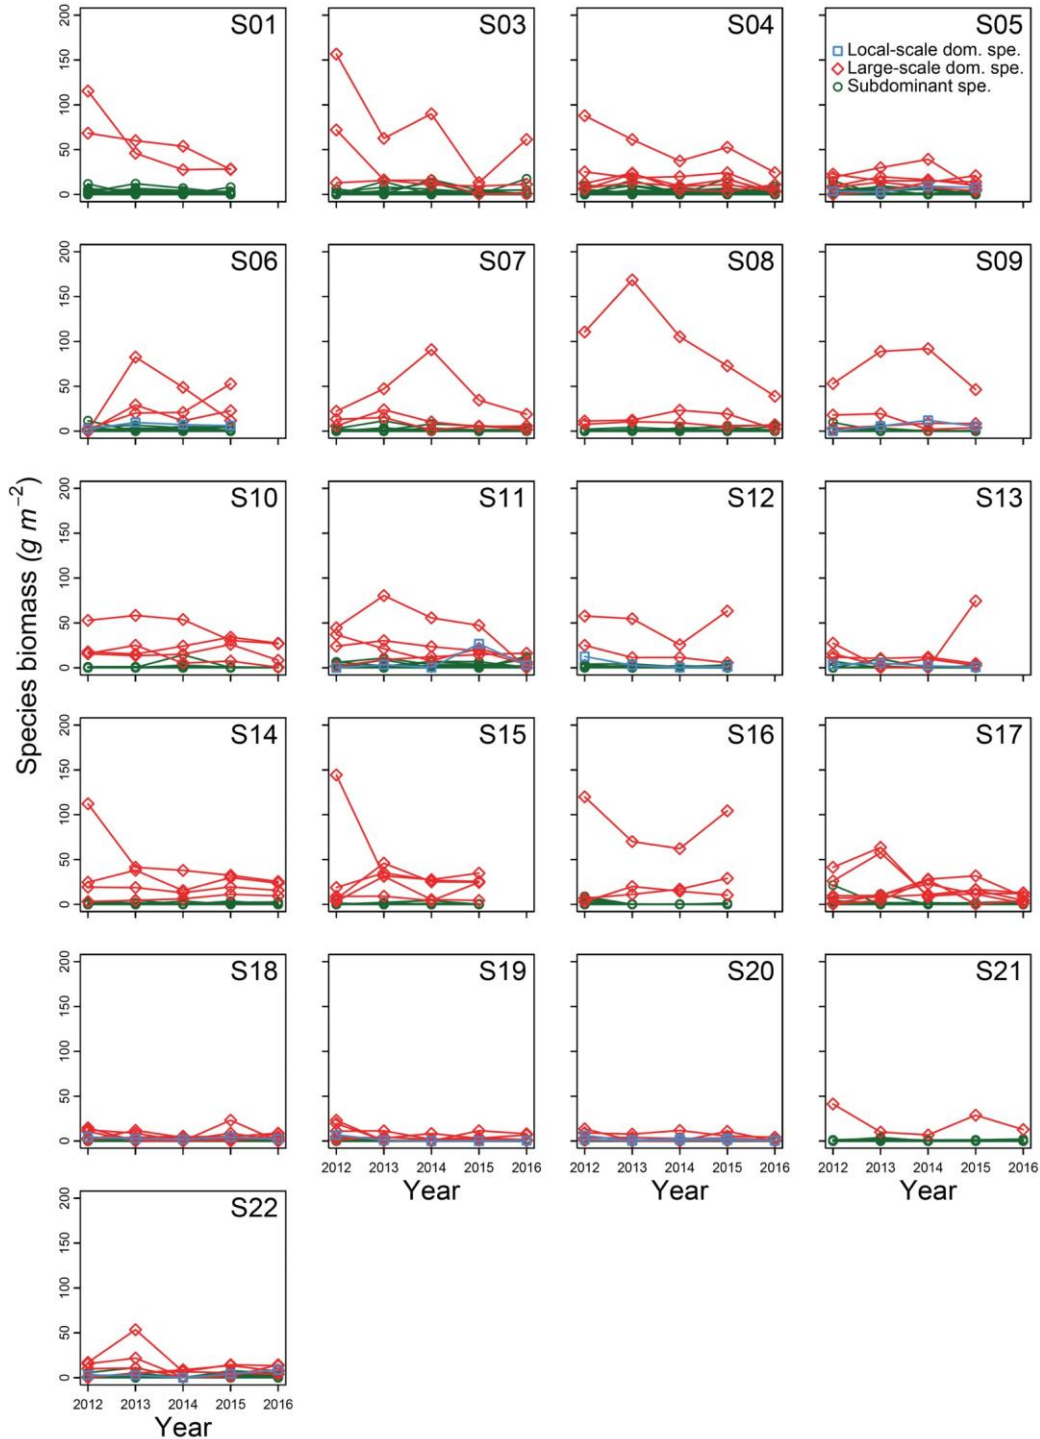

4  
5  
6 **Supplementary file 1–Figure 1.** Time series of plant species biomass in each surveyed site. Blue  
7 squares and lines represent species that only characterized as dominant species in local-scale  
8 communities. Red diamonds and lines represent species characterized as dominant species in

9 local-scale communities and can also be characterized as dominant species when aggregating into  
10 large-scale communities. Green circles and lines represent subdominant species. It showed that  
11 most dominant species of local-scale communities can be defined as dominant species of large-  
12 scale communities, with only few exceptions. In addition, these species have higher productivity  
13 than others roughly all the time and are constantly exist in surveyed sites. Dataset, code and  
14 relevant results can also be found in Figshare <https://doi.org/10.6084/m9.figshare.16903309>.  
15



1 **Supplementary file 2**

2 **Mathematical derivation for partitioning temporal stability and synchrony across**  
3 **ecological hierarchies into dominant and subdominant species groups**

4  
5 Here, we introduce mathematical derivations used to partition large-scale community  
6 temporal stability and its hierarchical components into dominant and subdominant species  
7 groups. These derivations based on previous theoretical investigations of (temporal) coefficient  
8 of variation (CV, inverse of temporal stability) and synchrony (inverse of asynchrony) across  
9 ecological hierarchies (Thibaut and Connolly, 2013; Wang et al., 2019; Wang and Loreau, 2016,  
10 2014). Briefly, these investigations have shown that local-scale population CV can be upscaled to  
11 that of large-scale community with two alternative pathways I or II. In the first upscaling  
12 pathway (pathway I), local-scale populations organize into local-scale communities, and then,  
13 local-scale communities aggregating into a large-scale community (Wang et al., 2019; Wang and  
14 Loreau, 2016, 2014) (Figure 1b). In another upscaling pathway (pathway II), local-scale  
15 populations scale up to large-scale populations, and then, large-scale populations organizing into  
16 a large-scale community (Wang et al., 2019; Wang and Loreau, 2016, 2014) (Figure 1b). In each  
17 upscaling pathway, synchrony at lower organization level or spatial scale determines the  
18 proportion of CV upscaled to higher organization level or spatial scale (Wang et al., 2019; Wang  
19 and Loreau, 2016, 2014). In the upscaling pathway of aggregating local-scale communities  
20 (pathway I), local-scale population CV firstly upscales to local-scale community CV with local-  
21 scale species synchrony measuring the proportion of CV transformed to local-scale community  
22 (Loreau and de Mazancourt, 2008; Thibaut and Connolly, 2013; Wang et al., 2019; Wang and  
23 Loreau, 2016, 2014). Subsequently, local-scale community CV upscales to large-scale  
24 community CV with community spatial synchrony measuring the proportion (Wang et al., 2019;

25 Wang and Loreau, 2016, 2014). In the upscaling pathway of organizing large-scale populations  
26 (pathway II), local-scale population CV first upscales to large-scale population CV with species  
27 spatial synchrony measuring how much CV has been upscaled, then, upscaling to the large-scale  
28 community CV with large-scale species synchrony measuring the proportion (Wang et al., 2019).  
29 Descriptions of these terms can be found in Table 1.

30 In the following part, we only introduce methods partitioning CVs and synchronies across  
31 ecological hierarchies into dominant (relative species abundance > 5%, see Supplementary file 1  
32 for details) and subdominant species groups without repeating previous theoretical derivations  
33 relating them across different hierarchies but recommended readers to these works for further  
34 details (Loreau and de Mazancourt, 2008; Thibaut and Connolly, 2013; Wang et al., 2019; Wang  
35 and Loreau, 2016, 2014). We used superscripts  $P$  and  $C$  to designate the quantities of population  
36 level and community level, superscripts  $L$  and  $A$  the quantities of localities (e.g. local-scale  
37 communities) and an aggregation of multiple localities (e.g. large-scale communities aggregating  
38 multiple local-scale communities), and superscript  $P \rightarrow C$  and  $L \rightarrow A$  the organization of  
39 populations into communities and aggregation of local-scale units into large scales. Symbols and  
40 descriptions used in the following partitions can be found in Table 1.

41 We consider a large-scale community reached a stationary state, which includes  $M$   
42 localities (e.g. sites or local-scale communities) and  $N$  species. This large-scale community can  
43 be described with a matrix of (temporal) mean species abundance with elements  $u^{P,L}(i, k)$ , i.e. the  
44 mean abundance of species  $k$  in locality  $i$ , and a (temporal) variance–covariance matrix of species  
45 abundances with elements  $v^{P,L}(ij, kl) = cov(u^{P,L}(i, k), u^{P,L}(j, l))$ , i.e. the covariance between  
46 abundances of species  $k$  in locality  $i$  and species  $l$  in locality  $j$ . In addition, we introduce two  
47 matrixes,  $d^P$  and  $s^P$ , to represent the dominant and subdominant species of the large-scale  
48 community, respectively. For the  $d^P$ , it has  $M$  rows and  $N$  columns, representing numbers of

49 localities and species of the large-scale community, and has elements  $d^P(i, k)$ , i.e. the  $k$ th species  
 50 of the  $i$ th locality, which is set to 1 if the  $k$ th species is a dominant species at the large scale,  
 51 otherwise, 0. Similar procedure is used to conduct the  $s^P$ , in which, subdominant species are set to  
 52 1, otherwise, 0.

53

54 **Supplementary file 2A. Partitioning local-scale population CV into dominant and**  
 55 **subdominant species groups**

56 The local-scale population CV ( $CV^{P,L}$ ) is defined as the weighted average local-scale  
 57 population CV, which can be described as follows (Thibaut and Connolly, 2013; Wang et al.,  
 58 2019; Wang and Loreau, 2016, 2014):

$$59 \quad CV^{P,L} = \frac{\sum_{i,k} \sqrt{v^{P,L}(ii,kk)}}{u^{C,A}} = \sum_{i,k} \frac{u^{P,L}(i,k)}{u^{C,A}} \frac{\sqrt{v^{P,L}(ii,kk)}}{u^{P,L}(i,k)} \quad (\text{eqn. S1})$$

60 We rewrite this equation with introduced two matrixes ( $d^P(i, k)$  and  $s^P(i, k)$ ) to separate  
 61 the local-scale population CV ( $CV^{P,L}$ ) into its dominant ( $CV_d^{P,L}$ ) and subdominant ( $CV_s^{P,L}$ )  
 62 species group components, which has the following description:

$$63 \quad CV^{P,L} = \sum_{i,k} d^P(i, k) \frac{u^{P,L}(i,k)}{u^{C,A}} \frac{\sqrt{v^{P,L}(ii,kk)}}{u^{P,L}(i,k)} + \sum_{i,k} s^P(i, k) \frac{u^{P,L}(i,k)}{u^{C,A}} \frac{\sqrt{v^{P,L}(ii,kk)}}{u^{P,L}(i,k)}$$

$$64 \quad = CV_d^{P,L} + CV_s^{P,L} \quad (\text{eqn. S2})$$

65

66 **Supplementary file 2B. Partitioning local-scale species synchrony into dominant and**  
 67 **subdominant species groups**

68 The local-scale species synchrony ( $\varphi^{P \rightarrow C,L}$ ) is defined as the weighted average  
 69 synchronous dynamics among populations of different species within local-scale communities,  
 70 which has the following description (Wang et al., 2019; Wang and Loreau, 2016, 2014):

$$71 \quad \varphi^{P \rightarrow C, L} = \frac{\sum_i \sqrt{v^{C, L}(ii)}}{\sum_{i, k} \sqrt{v^{P, L}(ii, kk)}} = \sum_i \frac{\sum_k \sqrt{v^{P, L}(ii, kk)}}{\sum_{i, k} \sqrt{v^{P, L}(ii, kk)}} \frac{\sqrt{\sum_{kl} v^{P, L}(ii, kl)}}{\sum_k \sqrt{v^{P, L}(ii, kk)}} = \sum_i \omega^{P \rightarrow C, L}(i) \varphi^{P \rightarrow C, L}(i) \quad (\text{eqn. S3})$$

72 where  $\omega^{P \rightarrow C, L}(i)$  and  $\varphi^{P \rightarrow C, L}(i)$  are the contribution of local-scale population variance of the  $i$ th  
 73 community to the sum of variance of all species local-scale populations within the large-scale  
 74 community and synchronous dynamics among local-scale populations of different species within  
 75 the  $i$ th local-scale community (i.e. species synchrony of the  $i$ th local-scale community, Loreau &  
 76 de Mazancourt 2008), respectively. We can rewrite  $\varphi^{P \rightarrow C, L}(i)$  with  $d^P(i, k)$  and  $s^P(i, k)$ , which has  
 77 the following description:

$$78 \quad (\varphi^{P \rightarrow C, L}(i))^2 = \frac{\sum_{kl} v^{P, L}(ii, kl)}{(\sum_k \sqrt{v^{P, L}(ii, kk)}})^2} = \frac{\sum_{kl} d^P(i, k) d^P(i, l) v^{P, L}(ii, kl)}{(\sum_k \sqrt{v^{P, L}(ii, kk)}})^2} + \frac{2 \sum_{kl} d^P(i, k) s^P(i, l) v^{P, L}(ii, kl)}{(\sum_k \sqrt{v^{P, L}(ii, kk)}})^2} +$$

$$79 \quad \frac{\sum_{kl} s^P(i, k) s^P(i, l) v^{P, L}(ii, kl)}{(\sum_k \sqrt{v^{P, L}(ii, kk)}})^2} \quad (\text{eqn. S4})$$

80 We defined the first term of the right-hand side of the eqn. S4 as the dominant-species  
 81 local-scale species synchrony of the  $i$ th local-scale community (Wang et al., 2020), which has the  
 82 following description:

$$83 \quad \varphi_d^{P \rightarrow C, L}(i) = \frac{\sqrt{\sum_{kl} d^P(i, k) d^P(i, l) v^{P, L}(ii, kl)}}{\sum_k \sqrt{v^{P, L}(ii, kk)}} \quad (\text{eqn. S5})$$

84 Then, using above description, we defined the dominant-species local-scale species  
 85 synchrony of the large-scale community ( $\varphi_d^{P \rightarrow C, L}$ ), i.e. an aggregation of multiple local-scale  
 86 communities, as the follows:

$$87 \quad \varphi_d^{P \rightarrow C, L} = \sum_i \omega^{P \rightarrow C, L}(i) \varphi_d^{P \rightarrow C, L}(i) \quad (\text{eqn. S6})$$

88 Referenced to the definition of local-scale community CV,  $CV^{C, L} = \varphi^{P \rightarrow C, L} \times CV^{P, L}$  (Wang  
 89 et al., 2019; Wang and Loreau, 2016, 2014), we defined the dominant-species local-scale  
 90 community CV ( $CV_d^{C, L}$ ) as follows:

$$91 \quad CV_d^{C, L} = \varphi_d^{P \rightarrow C, L} \times CV_d^{P, L} \quad (\text{eqn. S7})$$

92

93 **Supplementary file 2C. Partitioning community spatial synchrony into dominant and**  
 94 **subdominant species groups**

95 The community spatial synchrony ( $\varphi^{C,L \rightarrow A}$ ) defined as the weighted average synchronous  
 96 dynamics among spatially separated local-scale communities, which has the following  
 97 description (Wang et al., 2019; Wang and Loreau, 2016, 2014):

$$98 \quad (\varphi^{C,L \rightarrow A})^2 = \frac{\sum_{ij} v^{C,L}(ij)}{(\sum_i \sqrt{v^{C,L}(ii)})^2} = \frac{\sum_{ij,kl} v^{P,L}(ij,kl)}{(\sum_i \sqrt{v^{C,L}(ii)})^2} \quad (\text{eqn. S8})$$

99 Using  $d^P(i, k)$  and  $s^P(i, k)$  mentioned above, we partitioned community spatial synchrony  
 100 into dominant ( $\varphi_d^{C,L \rightarrow A}$ ), subdominant species groups ( $\varphi_s^{C,L \rightarrow A}$ ) and synchronous dynamic  
 101 between them ( $\varphi_{ds}^{C,L \rightarrow A}$ ) with the following description:

$$102 \quad (\varphi^{C,L \rightarrow A})^2 = \frac{\sum_{ij,kl} d^P(i,k)d^P(j,l)v^{P,L}(ij,kl)}{(\sum_i \sqrt{v^{C,L}(ii)})^2} + \frac{2 \sum_{ij,kl} d^P(i,k)s^P(j,l)v^{P,L}(ij,kl)}{(\sum_i \sqrt{v^{C,L}(ii)})^2} + \frac{\sum_{ij,kl} s^P(i,k)s^P(j,l)v^{P,L}(ij,kl)}{(\sum_i \sqrt{v^{C,L}(ii)})^2}$$

$$103 \quad = (\varphi_d^{C,L \rightarrow A})^2 + (\varphi_{ds}^{C,L \rightarrow A})^2 + (\varphi_s^{C,L \rightarrow A})^2 \quad (\text{eqn. S9})$$

104 Referenced to the definition of large-scale community CV with the upscaling pathway of  
 105 aggregating local-scale communities (pathway I),  $CV^{C,A} = \varphi^{C,L \rightarrow A} \times CV^{C,L}$  (Wang et al., 2019;  
 106 Wang and Loreau, 2016, 2014), we defined the dominant-species large-scale community CV with  
 107 this upscaling pathway ( $CV_{d_C}^{C,R}$ ) as follows:

$$108 \quad CV_{d_C}^{C,A} = \varphi_d^{C,L \rightarrow A} \times CV_d^{C,L} = \varphi_d^{C,L \rightarrow A} \times \varphi_d^{P \rightarrow C,L} \times CV_d^{P,L} \quad (\text{eqn. S10})$$

109

110 **Supplementary file 2D. Partitioning species spatial synchrony into dominant and**  
 111 **subdominant species groups**

112 The species spatial synchrony ( $\varphi^{P,L \rightarrow A}$ ) is defined as the weighted average synchronous  
 113 dynamics among spatially separated local-scale populations of same species, which has the  
 114 following description (Wang et al., 2019):

$$115 \quad \varphi^{P,L \rightarrow A} = \frac{\sum_k \sqrt{v^{P,A}(kk)}}{\sum_{i,k} \sqrt{v^{P,L}(ii,kk)}} = \sum_k \frac{\sum_i \sqrt{v^{P,L}(ii,kk)}}{\sum_{i,k} \sqrt{v^{P,L}(ii,kk)}} \frac{\sqrt{\sum_{ij} v^{P,L}(ij,kk)}}{\sum_i \sqrt{v^{P,L}(ii,kk)}} = \sum_k \omega^{P,L \rightarrow A}(k) \varphi^{P,L \rightarrow A}(k) \quad (\text{eqn. S11})$$

116 where  $\omega^{P,L \rightarrow A}(k)$  and  $\varphi^{P,L \rightarrow A}(k)$  are the contribution of population variance of the  $k$ th species to  
 117 that of all species within the large-scale community and synchrony within the  $k$ th species among  
 118 sites, respectively. We can rewrite  $\varphi^{P,L \rightarrow A}(k)$  with  $d^P(i, k)$  and  $s^P(i, k)$ , which has the following  
 119 description:

$$120 \quad (\varphi^{P,L \rightarrow A}(k))^2 = \frac{\sum_{ij} v^{P,L}(ij,kk)}{(\sum_i \sqrt{v^{P,L}(ii,kk)})^2} = \frac{\sum_{ij} d^P(i,k) d^P(j,k) v^{P,L}(ij,kk)}{(\sum_i \sqrt{v^{P,L}(ii,kk)})^2} + \frac{2 \sum_{ij} d^P(i,k) s^P(j,k) v^{P,L}(ij,kk)}{(\sum_i \sqrt{v^{P,L}(ii,kk)})^2} +$$

$$121 \quad \frac{\sum_{ij} s^P(i,k) s^P(j,k) v^{P,L}(ij,kk)}{(\sum_i \sqrt{v^{P,L}(ii,kk)})^2} \quad (\text{eqn. S12})$$

122 We defined the first term of the right-hand side of above equation as the species spatial  
 123 synchrony of the  $k$ th (dominant) species, which has the following description:

$$124 \quad \varphi_d^{P,L \rightarrow A}(k) = \frac{\sqrt{\sum_{ij} d^P(i,k) d^P(j,k) v^{P,L}(ij,kk)}}{\sum_i \sqrt{v^{P,L}(ii,kk)}} \quad (\text{eqn. S13})$$

125 Then, using above description, we defined the dominant species spatial synchrony  
 126 ( $\varphi_d^{P,L \rightarrow A}$ ) as the follows:

$$127 \quad \varphi_d^{P,L \rightarrow A} = \sum_k \omega^{P,L \rightarrow A}(k) \varphi_d^{P,L \rightarrow A}(k) \quad (\text{eqn. S14})$$

128 Referenced to the definition of large-scale population CV,  $CV^{P,A} = \varphi^{P,L \rightarrow A} \times CV^{P,L}$  (Wang  
 129 et al., 2019), we defined the dominant-species large-scale population CV ( $CV_d^{P,A}$ ) as follows:

$$130 \quad CV_d^{P,A} = \varphi_d^{P,L \rightarrow A} \times CV_d^{P,L} \quad (\text{eqn. S15})$$

131

132 **Supplementary file 2E. Partitioning large-scale species synchrony into dominant and**  
 133 **subdominant species groups**

134 The large-scale species synchrony ( $\varphi^{P \rightarrow C,A}$ ) is defined as the weighted average  
 135 synchronous dynamics among large-scale populations of different species, which has the  
 136 following description (Wang et al., 2019):

$$137 \quad (\varphi^{P \rightarrow C,A})^2 = \frac{\sum_{kl} v^{P,A}(kl)}{(\sum_k \sqrt{v^{P,A}(kk)})^2} = \frac{\sum_{ij,kl} v^{P,L}(ij,kl)}{(\sum_k \sqrt{v^{P,A}(kk)})^2} \quad (\text{eqn. S16})$$

138 Here,  $v^{P,A}(kl)$  is the covariance between  $k$  and  $l$  large-scale populations. We partitioned the  
 139 large-scale species synchrony into dominant ( $\varphi_d^{S \rightarrow C,A}$ ), subdominant species groups ( $\varphi_s^{S \rightarrow C,A}$ ) and  
 140 synchronous dynamic between them ( $\varphi_{ds}^{S \rightarrow C,A}$ ) using introduced  $d^P(i, k)$  and  $s^P(i, k)$  with the  
 141 following description:

$$142 \quad (\varphi^{P \rightarrow C,A})^2 = \frac{\sum_{ij,kl} v^{P,L}(ij,kl)}{(\sum_k \sqrt{v^{P,A}(kk)})^2} = \frac{\sum_{ij,kl} d^P(i,k) d^P(j,l) v^{P,L}(ij,kl)}{(\sum_k \sqrt{v^{P,A}(kk)})^2} + \frac{2 \sum_{ij,kl} d^P(i,k) s^P(j,l) v^{P,L}(ij,kl)}{(\sum_k \sqrt{v^{P,A}(kk)})^2} +$$

$$143 \quad \frac{\sum_{ij,kl} s^P(i,k) s^P(j,l) v^{P,L}(ij,kl)}{(\sum_k \sqrt{v^{P,A}(kk)})^2} = (\varphi_d^{P \rightarrow C,A})^2 + (\varphi_{ds}^{P \rightarrow C,A})^2 + (\varphi_s^{P \rightarrow C,A})^2 \quad (\text{eqn. S17})$$

144 Referenced to the definition of large-scale community CV with the upscaling pathway of  
 145 organizing large-scale populations (pathway II),  $CV^{C,A} = \varphi^{P \rightarrow C,A} \times CV^{P,A}$  (S. Wang et al., 2019),  
 146 we defined the dominant-species large-scale community CV with this upscaling pathway  
 147 ( $CV_{d_P}^{C,A}$ ) as follows:

$$148 \quad CV_{d_P}^{C,A} = \varphi_d^{P \rightarrow C,A} \times CV_d^{P,A} = \varphi_d^{P \rightarrow C,A} \times \varphi_d^{P,L \rightarrow A} \times CV_d^{P,L} \quad (\text{eqn. S18})$$

149  
 150 **Supplementary file 2F. Comparing dominant-species large-scale community CVs estimated**  
 151 **with two alternative upscaling pathways**

152 Based on recent theoretical study (S. Wang et al., 2019), the large-scale community CV  
 153 can be upscaled by aggregating local-scale communities ( $CV_C^{C,A}$ ) or organizing large-scale  
 154 populations ( $CV_P^{C,A}$ ), which have the following descriptions:

$$155 \quad CV_C^{C,A} = \varphi^{C,L \rightarrow A} \times \varphi^{P \rightarrow C,L} \times CV^{P,L}$$

$$156 \quad = \frac{\sqrt{\sum_{ij,kl} v^{P,L}(ij,kl)}}{\sum_i \sqrt{v^{C,L}(ii)}} \times \frac{\sum_i \sqrt{v^{C,L}(ii)}}{\sum_{i,k} \sqrt{v^{P,L}(ii,kk)}} \times \frac{\sum_{i,k} \sqrt{v^{P,L}(ii,kk)}}{u^{C,A}} = \frac{\sqrt{\sum_{ij,kl} v^{P,L}(ij,kl)}}{u^{C,A}} \quad (\text{eqn. S19})$$

$$157 \quad CV_P^{C,A} = \varphi^{P \rightarrow C,A} \times \varphi^{P,L \rightarrow A} \times CV^{P,L}$$

$$158 \quad = \frac{\sqrt{\sum_{ij,kl} v^{P,L}(ij,kl)}}{\sum_k \sqrt{v^{P,A}(kk)}} \times \frac{\sum_k \sqrt{v^{P,A}(kk)}}{\sum_{i,k} \sqrt{v^{P,L}(ii,kk)}} \times \frac{\sum_{i,k} \sqrt{v^{P,L}(ii,kk)}}{u^{C,A}} = \frac{\sqrt{\sum_{ij,kl} v^{P,L}(ij,kl)}}{u^{C,A}} \quad (\text{eqn. S20})$$

159 These descriptions (eqn. S19 and S20) showed that the large-scale community CV  
 160 estimated with two different upscaling pathways are equal to each other.

161 In the following part, we explain why the dominant-species large-scale community CV  
 162 estimated with two different upscaling pathways are not equal to each other ( $CV_{d_C}^{C,A}$  for  
 163 estimated via aggregating local-scale communities, pathway I, and  $CV_{d_P}^{C,A}$  for estimated via  
 164 organizing large-scale populations, pathway II). The dominant-species large-scale community  
 165 CV estimated by aggregating local-scale communities ( $CV_{d_C}^{C,A}$ ) has the following description:

$$166 \quad CV_{d_C}^{C,A} = \varphi_d^{C,L \rightarrow A} \times \varphi_d^{P \rightarrow C,L} \times CV_d^{P,L} = \frac{\sqrt{\sum_{ij,kl} d^P(i,k) d^P(j,l) v^{P,L}(ij,kl)}}{\sum_i \sqrt{v^{C,L}(ii)}} \times \frac{\sum_i \sqrt{\sum_{kl} d^P(i,k) d^P(i,l) v^{P,L}(ii,kl)}}{\sum_{i,k} \sqrt{v^{P,L}(ii,kk)}}$$

$$167 \quad \times \frac{\sum_{i,k} d^P(i,k) \sqrt{v^{P,L}(ii,kk)}}{u^{C,A}} \quad (\text{eqn. S21})$$

168 The dominant-species large-scale community CV estimated by organizing large-scale  
 169 populations ( $CV_{d_P}^{C,A}$ ) has the following description:

$$170 \quad CV_{d_P}^{C,A} = \varphi_d^{P \rightarrow C,A} \times \varphi_d^{P,L \rightarrow A} \times CV_d^{P,L} = \frac{\sqrt{\sum_{ij,kl} d^P(i,k) d^P(j,l) v^{P,L}(ij,kl)}}{\sum_k \sqrt{v^{P,A}(kk)}} \times \frac{\sum_k \sqrt{\sum_{ij} d^P(i,k) d^P(j,k) v^{P,L}(ij,kk)}}{\sum_{i,k} \sqrt{v^{P,L}(ii,kk)}}$$



171 
$$\times \frac{\sum_{i,k} d^P(i,k) \sqrt{v^{P,L}(ii,kk)}}{u^{C,A}} \quad (\text{eqn. S22})$$

172 Owing to these two equations have either same terms or different terms

173 
$$\left( \frac{\sum_i \sqrt{\sum_{kl} d^P(i,k) d^P(i,l) v^{P,L}(ii,kl)}}{\sum_i \sqrt{v^{C,L}(ii)}} \right)$$
 in eqn. S21 and 
$$\frac{\sum_k \sqrt{\sum_{ij} d^P(i,k) d^P(j,k) v^{P,L}(ij,kk)}}{\sum_k \sqrt{v^{P,A}(kk)}}$$
 in eqn. S22), the

174 dominant-species large-scale community CV estimated with two different upscaling pathways  
 175 should be well correlated but not totally same. For the denominators of these two different terms,  
 176 they are sum of local-scale community variances and sum of large-scale population variances.

177 For the numerators of them, they are sum of variance (and covariance) of different dominant  
 178 species within same local communities and sum of variances (and covariance) of same dominant  
 179 species across different local communities. These differences reflect that dominant-species large-

180 scale community CVs estimated via aggregating local-scale communities ( $CV_{d_C}^{C,A}$ ) and via  
 181 organizing large-scale populations ( $CV_{d_P}^{C,A}$ ) focus on different dominant species within same  
 182 local-scale communities and same dominant species across different local-scale communities,

183 respectively. Owing to the potential difference, we separately reported them (Supplementary file  
 184 5–Figure1a–b). It is also need to note that the different terms in eqn. S21 and eqn. S22 can be

185 same when considering all species. This is because, in this case, they become to  $\frac{\sum_i \sqrt{\sum_{kl} v^{P,L}(ii,kl)}}{\sum_i \sqrt{v^{C,L}(ii)}}$

186 and  $\frac{\sum_k \sqrt{\sum_{ij} v^{P,L}(ij,kk)}}{\sum_k \sqrt{v^{P,A}(kk)}}$ , and both of them are equal to 1, resulting in same large-scale community

187 CV estimated with all species using different upscaling pathways.

188

189 **References**

- 190 Loreau M, de Mazancourt C. 2008. Species synchrony and its drivers: neutral and nonneutral  
191 community dynamics in fluctuating environments. *The American Naturalist* **172**:E48–  
192 E66. doi:10.1086/589746
- 193 Thibaut LM, Connolly SR. 2013. Understanding diversity–stability relationships: towards a  
194 unified model of portfolio effects. *Ecology Letters* **16**:140–150. doi:10.1111/ele.12019
- 195 Wang S, Lamy T, Hallett LM, Loreau M. 2019. Stability and synchrony across ecological  
196 hierarchies in heterogeneous metacommunities: linking theory to data. *Ecography*  
197 **42**:1200–1211. doi:10.1111/ecog.04290
- 198 Wang S, Loreau M. 2016. Biodiversity and ecosystem stability across scales in  
199 metacommunities. *Ecology Letters* **19**:510–518. doi:10.1111/ele.12582
- 200 Wang S, Loreau M. 2014. Ecosystem stability in space:  $\alpha$ ,  $\beta$  and  $\gamma$  variability. *Ecology Letters*  
201 **17**:891–901. doi:10.1111/ele.12292
- 202 Wang Y, Niu X, Zhao L, Liang C, Miao B, Zhang Q, Zhang J, Schmid B, Ma W. 2020. Biotic  
203 stability mechanisms in Inner Mongolian grassland. *Proceedings of the Royal Society B:*  
204 *Biological Sciences* **287**:20200675. doi:10.1098/rspb.2020.0675
- 205

1 **Supplementary file 3**  
 2 **Impacts of spatial distance on coefficients of variation and synchronies across spatial scales**  
 3

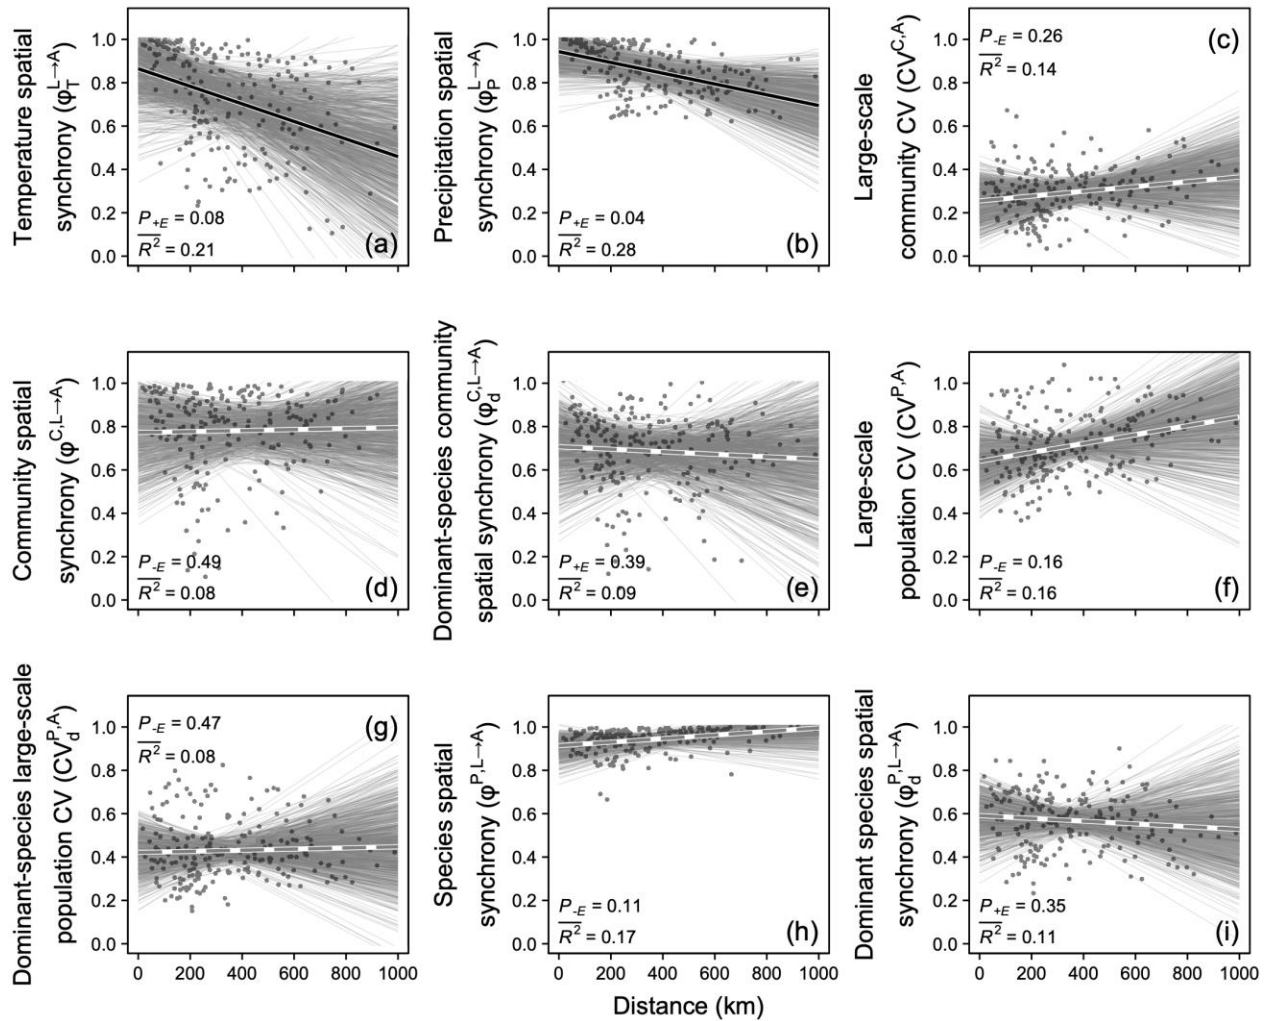

4  
 5  
 6 **Supplementary file 3—Figure 1.** Spatial synchronies of temperature (a) and precipitation (b),  
 7 large-scale community coefficient of variation (CV, inverse of temporal stabilities, c) and all-  
 8 species and dominant-species estimates of community spatial synchrony (inverse of asynchrony,  
 9 d and e), large-scale population CV (f and g) and species spatial synchrony (h and i) in relation to  
 10 distance. Solid black lines represent significant ( $P < 0.05$ ) and marginally significant ( $P < 0.10$ )  
 11 and dashed grey line represents non-significant ( $P > 0.10$ ) relationships (see Materials and  
 12 Methods for details). Symbols and descriptions can be found in Table 1. Dataset, code and  
 13 relevant results can also be found in Figshare <https://doi.org/10.6084/m9.figshare.16903309>.

1 **Supplementary file 4**  
 2 **Results of general linear models examining impacts of species diversity on large-scale**  
 3 **community coefficient of variation and its hierarchical components**

4  
 5 **Supplementary file 4–Table 1.** General linear models for relating coefficients of variation (CVs,  
 6 inverse of temporal stability) across organization levels and spatial scales to their hierarchical  
 7 components and species diversity indices. Reported are the mean value of the estimated slope  
 8 parameter ( $\bar{E}$ ) and its 10% and 90% quantiles ( $QE_{10}$  and  $QE_{90}$ ), the mean values of the  
 9 explanatory power ( $\bar{R}^2$ ), the proportion of  $E < 0$  ( $P_{-E}$ ) when  $\bar{E} > 0$  (or the proportion of  $E > 0$ ,  
 10  $P_{+E}$ , when  $\bar{E} < 0$ ), and the mean proportion of variance explained by the variables ( $\bar{SS}$ ). All these  
 11 statistics are based on 1000 random splits of the dataset into ten large-scale communities each  
 12 time. Dataset, code and relevant results can also be found in Figshare  
 13 <https://doi.org/10.6084/m9.figshare.16903309>.

14

| Independent variable                                                                                                                    | $\bar{E}$ | $QE_{10}$ | $QE_{90}$ | $P_{-E}$ or $P_{+E}$ | $\bar{SS}$ |
|-----------------------------------------------------------------------------------------------------------------------------------------|-----------|-----------|-----------|----------------------|------------|
| <b>Model 1: Large-scale community CV ~ Community spatial synchrony + Local-scale community CV + Gamma species richness</b>              |           |           |           |                      |            |
| $\bar{R}^2 = 0.99$                                                                                                                      |           |           |           |                      |            |
| Community spatial synchrony                                                                                                             | 0.586     | 0.356     | 0.838     | 0.000                | 0.417      |
| Local-scale community CV                                                                                                                | 0.789     | 0.580     | 1.027     | 0.000                | 0.565      |
| Gamma species richness                                                                                                                  | -0.007    | -0.076    | 0.055     | 0.447                | 0.002      |
| <b>Model 2: Large-scale community CV ~ Community spatial synchrony + Local-scale community CV + Gamma effective species richness</b>    |           |           |           |                      |            |
| $\bar{R}^2 = 0.99$                                                                                                                      |           |           |           |                      |            |
| Community spatial synchrony                                                                                                             | 0.599     | 0.365     | 0.853     | 0.000                | 0.417      |
| Local-scale community CV                                                                                                                | 0.790     | 0.588     | 1.023     | 0.000                | 0.565      |
| Gamma effective species richness                                                                                                        | -0.004    | -0.071    | 0.066     | 0.443                | 0.003      |
| <b>Model 3: Large-scale community CV ~ Community spatial synchrony + Local-scale community CV + Beta species richness</b>               |           |           |           |                      |            |
| $\bar{R}^2 = 0.98$                                                                                                                      |           |           |           |                      |            |
| Community spatial synchrony                                                                                                             | 0.588     | 0.358     | 0.848     | 0.000                | 0.417      |
| Local-scale community CV                                                                                                                | 0.788     | 0.584     | 1.028     | 0.000                | 0.565      |
| Beta species richness                                                                                                                   | 0.004     | -0.057    | 0.067     | 0.464                | 0.002      |
| <b>Model 4: Large-scale community CV ~ Community spatial synchrony + Local-scale community CV + Beta effective species richness</b>     |           |           |           |                      |            |
| $\bar{R}^2 = 0.98$                                                                                                                      |           |           |           |                      |            |
| Community spatial synchrony                                                                                                             | 0.593     | 0.359     | 0.850     | 0.000                | 0.417      |
| Local-scale community CV                                                                                                                | 0.792     | 0.584     | 1.028     | 0.000                | 0.565      |
| Beta effective species richness                                                                                                         | 0.008     | -0.060    | 0.073     | 0.417                | 0.002      |
| <b>Model 5: Large-scale community CV ~ Local-scale species synchrony + Local-scale population CV + Gamma species richness</b>           |           |           |           |                      |            |
| $\bar{R}^2 = 0.72$                                                                                                                      |           |           |           |                      |            |
| Local-scale species synchrony                                                                                                           | 0.500     | 0.211     | 0.756     | 0.014                | 0.337      |
| Local-scale population CV                                                                                                               | 0.568     | 0.261     | 0.827     | 0.022                | 0.345      |
| Gamma species richness                                                                                                                  | 0.017     | -0.230    | 0.269     | 0.458                | 0.038      |
| <b>Model 6: Large-scale community CV ~ Local-scale species synchrony + Local-scale population CV + Gamma effective species richness</b> |           |           |           |                      |            |
| $\bar{R}^2 = 0.72$                                                                                                                      |           |           |           |                      |            |
| Local-scale species synchrony                                                                                                           | 0.510     | 0.180     | 0.826     | 0.035                | 0.337      |
| Local-scale population CV                                                                                                               | 0.564     | 0.216     | 0.867     | 0.040                | 0.345      |
| Gamma effective species richness                                                                                                        | 0.021     | -0.341    | 0.401     | 0.487                | 0.041      |
| <b>Model 7: Large-scale community CV ~ Local-scale species synchrony + Local-scale population CV + Beta species richness</b>            |           |           |           |                      |            |
| $\bar{R}^2 = 0.72$                                                                                                                      |           |           |           |                      |            |
| Local-scale species synchrony                                                                                                           | 0.503     | 0.209     | 0.786     | 0.023                | 0.337      |
| Local-scale population CV                                                                                                               | 0.574     | 0.271     | 0.836     | 0.017                | 0.345      |
| Beta species richness                                                                                                                   | -0.021    | -0.274    | 0.277     | 0.441                | 0.036      |
| <b>Model 8: Large-scale community CV ~ Local-scale species synchrony + Local-scale population CV + Beta effective species richness</b>  |           |           |           |                      |            |
| $\bar{R}^2 = 0.72$                                                                                                                      |           |           |           |                      |            |

|                                                                                                                                          |        |        |       |       |       |
|------------------------------------------------------------------------------------------------------------------------------------------|--------|--------|-------|-------|-------|
| Local-scale species synchrony                                                                                                            | 0.510  | 0.217  | 0.785 | 0.017 | 0.337 |
| Local-scale population CV                                                                                                                | 0.574  | 0.261  | 0.842 | 0.018 | 0.345 |
| Beta effective species richness                                                                                                          | 0.034  | -0.261 | 0.352 | 0.449 | 0.041 |
| <b>Model 9: Local-scale community CV ~ Local-scale species synchrony + Local-scale population CV + Alpha species richness</b>            |        |        |       |       |       |
| <b><math>\overline{R^2} = 0.99</math></b>                                                                                                |        |        |       |       |       |
| Local-scale species synchrony                                                                                                            | 0.642  | 0.490  | 0.812 | 0.000 | 0.473 |
| Local-scale population CV                                                                                                                | 0.736  | 0.588  | 0.900 | 0.000 | 0.518 |
| Alpha species richness                                                                                                                   | 0.003  | -0.041 | 0.046 | 0.454 | 0.001 |
| <b>Model 10: Local-scale community CV ~ Local-scale species synchrony + Local-scale population CV + Alpha effective species richness</b> |        |        |       |       |       |
| <b><math>\overline{R^2} = 0.99</math></b>                                                                                                |        |        |       |       |       |
| Local-scale species synchrony                                                                                                            | 0.632  | 0.469  | 0.807 | 0.000 | 0.473 |
| Local-scale population CV                                                                                                                | 0.746  | 0.593  | 0.909 | 0.000 | 0.518 |
| Alpha effective species richness                                                                                                         | -0.016 | -0.085 | 0.052 | 0.381 | 0.001 |

15

1 **Supplementary file 5**  
 2 **All-species measures of coefficients of variation and synchronies across spatial scales in**  
 3 **relation to their dominant-species counterparts**  
 4

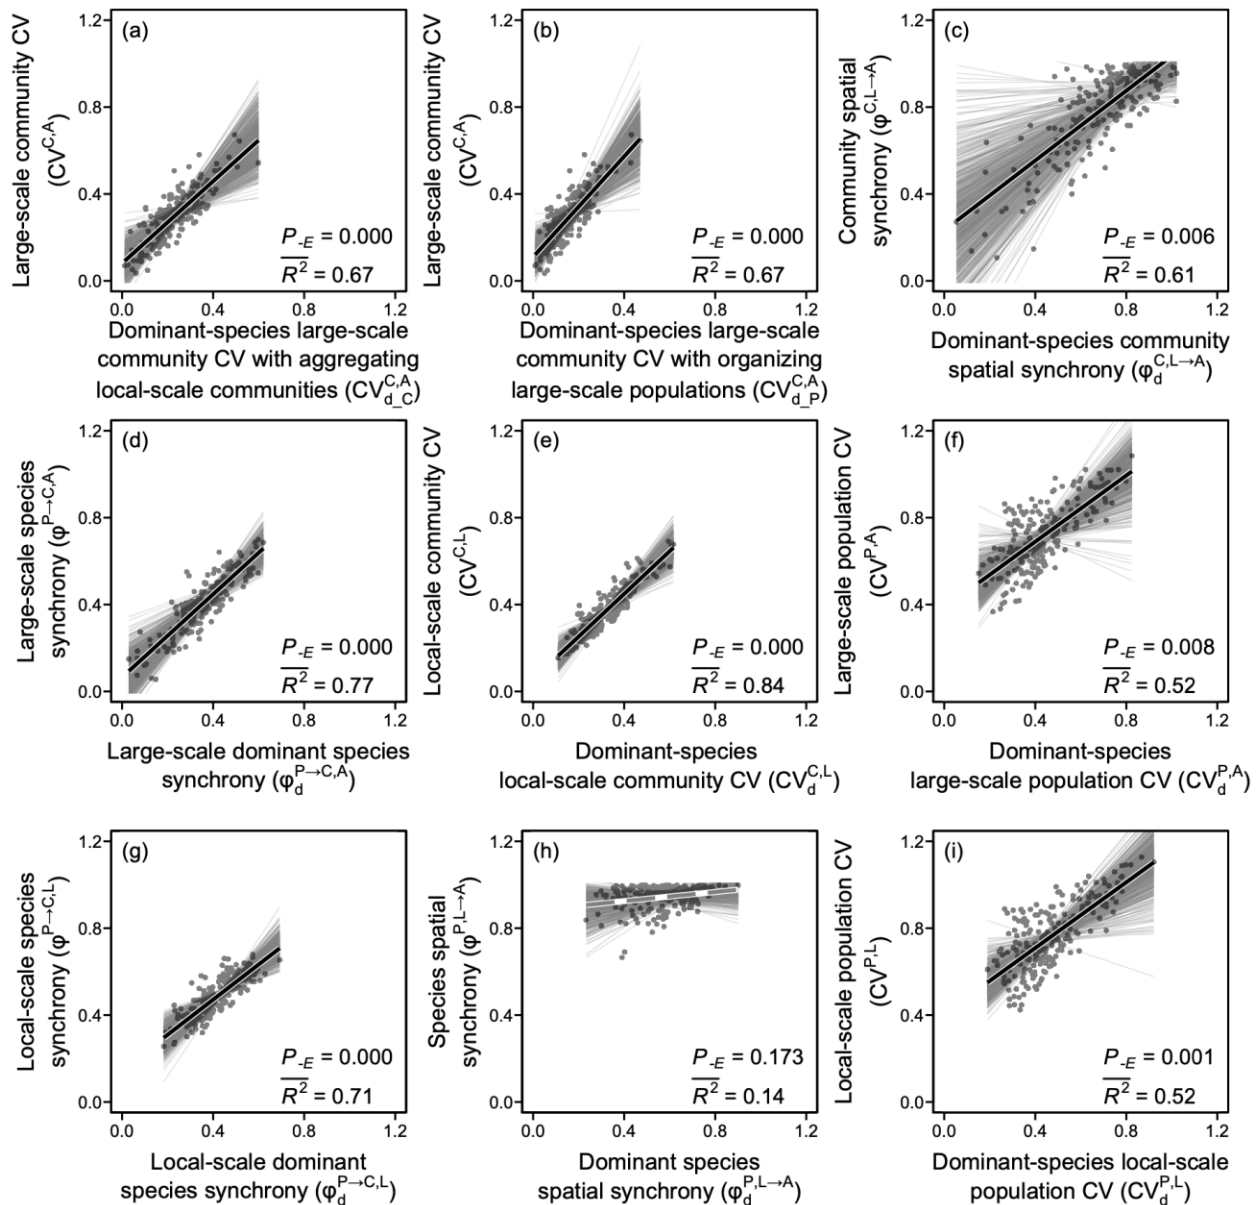

5  
 6  
 7 **Supplementary file 5–Figure 1.** Coefficients of variation (CVs, inverse of temporal stabilities)  
 8 and synchronies (inverse of asynchronies) across hierarchical levels of ecological organization in  
 9 relation to their dominant-species counterparts. Solid black lines represent significant ( $P < 0.05$ )  
 10 and marginally significant ( $P < 0.10$ ) relationships and dashed grey line represents non-  
 11 significant ( $P > 0.10$ ) relationship (see Materials and Methods for details and Supplementary file  
 12 2F for estimating dominant-species large-scale community CV with upscaling pathways of  
 13 aggregating local-scale communities, pathway I, and organizing large-scale populations, pathway  
 14 II). Dataset, code and relevant results can also be found in Figshare  
 15 <https://doi.org/10.6084/m9.figshare.16903309>.
